# Supplementary material for: Temperature dependent mechanism transition effect stabilized ruthenium-based oxides for water oxidation in proton exchange membrane electrolyzer
Source: Research Square preprint supplement (doi:10.21203/rs.3.rs-4097038/v1), 2025-03-06
Supplement: Supplementary file 1 [file cd897dfc8d046d9ecf7659c6.docx]

**Supplementary Information**

Qu et al.

**Supplementary Figures**


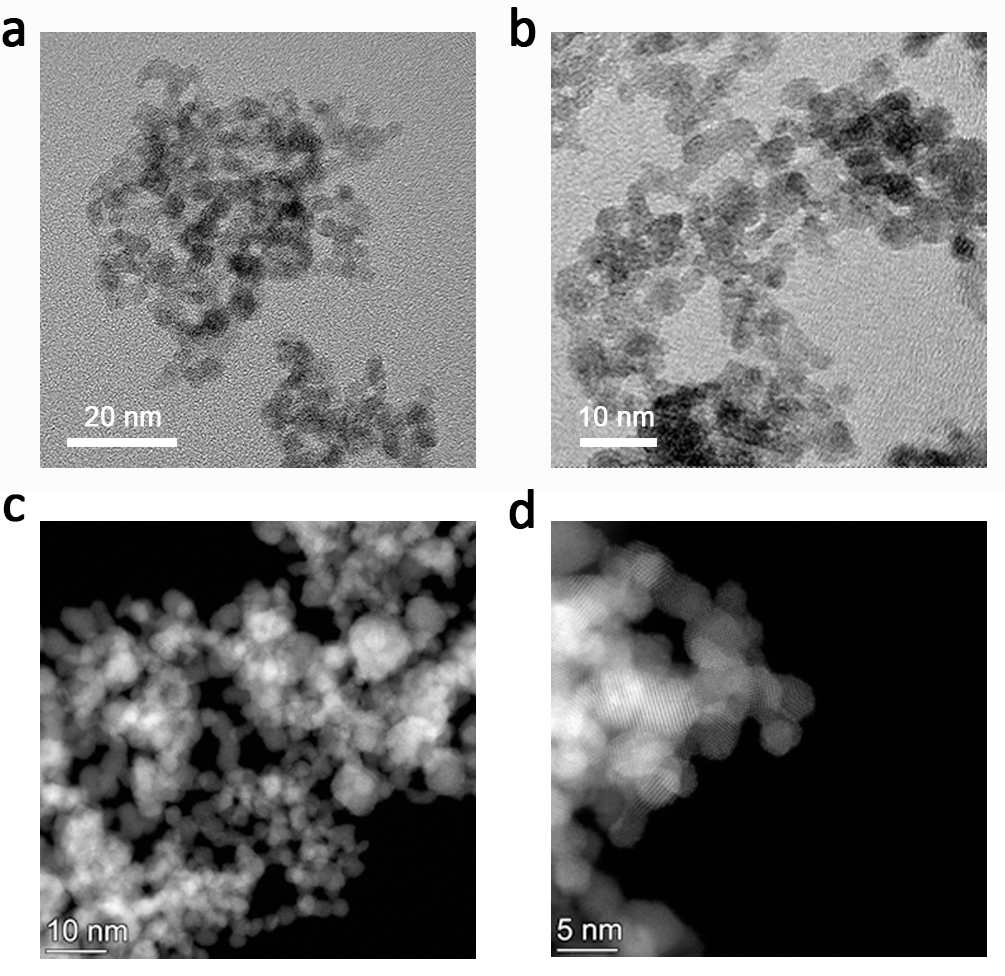


**Supplementary Figure 1. Microscopic images.** (**a, b**) TEM, and (**c, d**) HAADF-STEM images of RhRu3Ox.


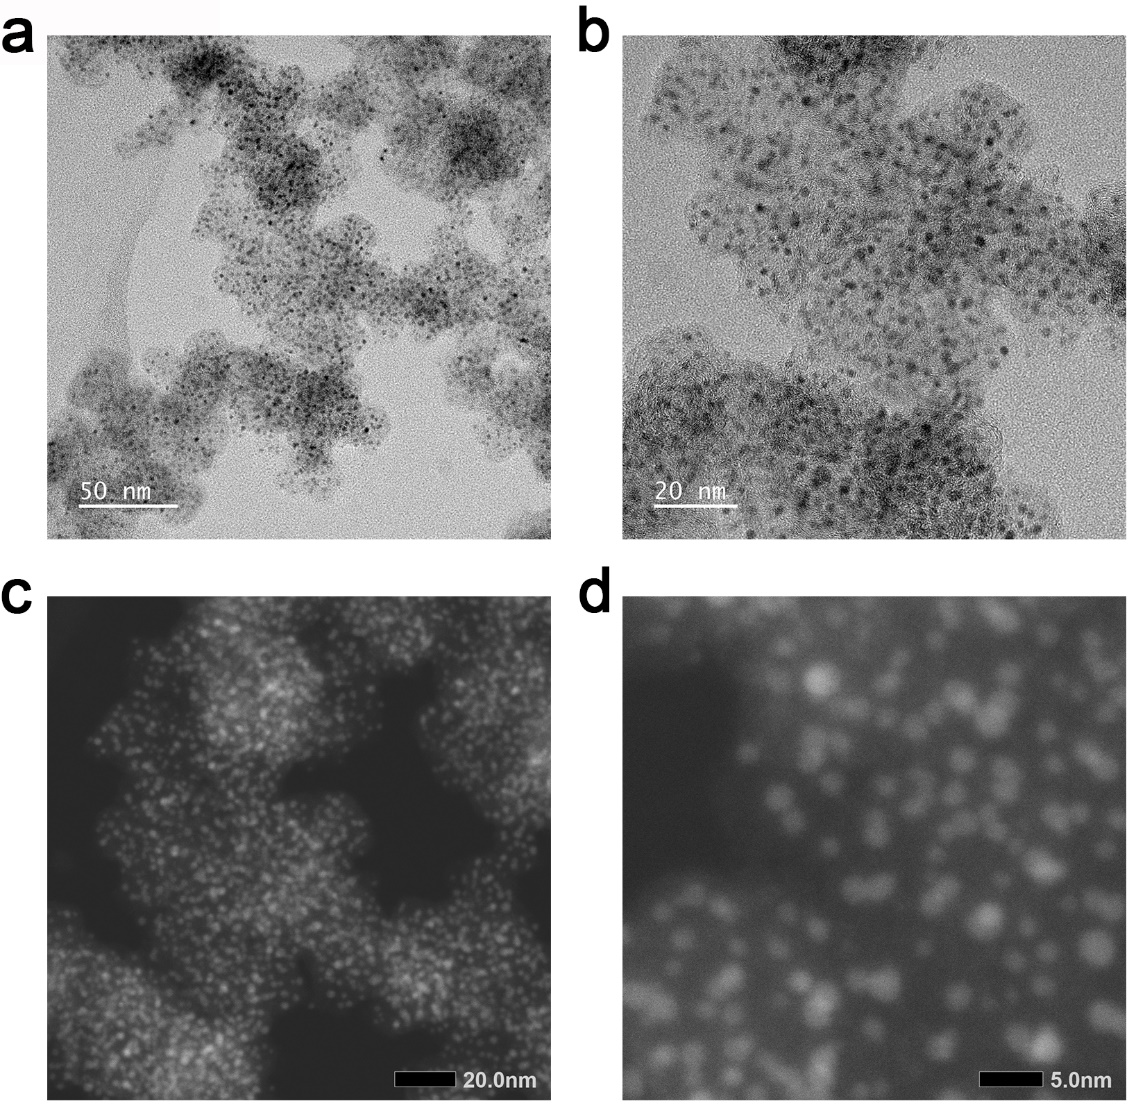


**Supplementary Figure 2. Microscopic images.** (**a, b**) TEM, and (**c, d**) HAADF-STEM images of RhRu3/C.


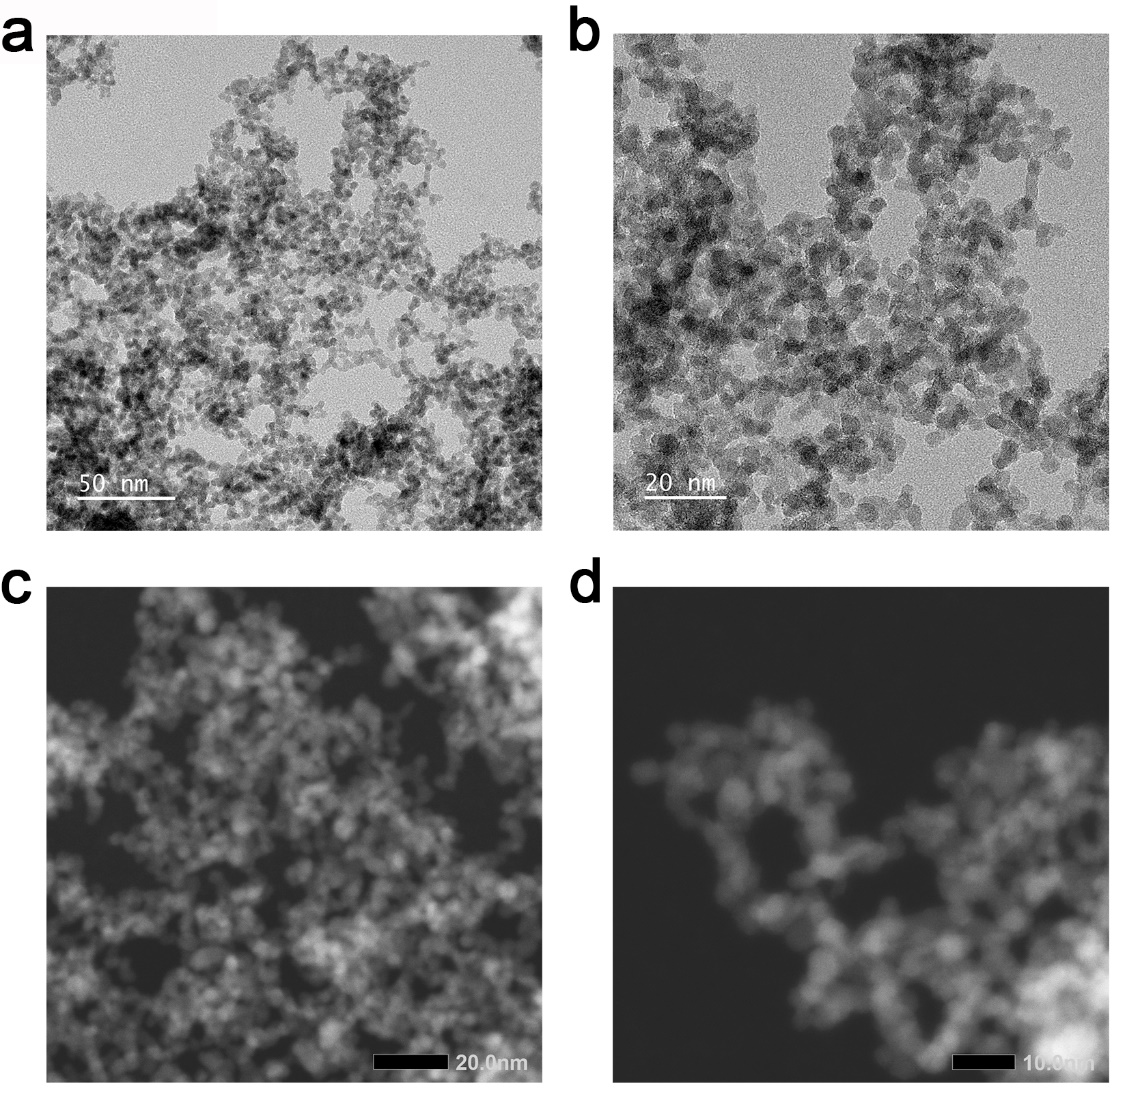


**Supplementary Figure 3. Microscopic images.** (**a, b**) TEM, and (**c, d**) HAADF-STEM images of Hom-RuO2.


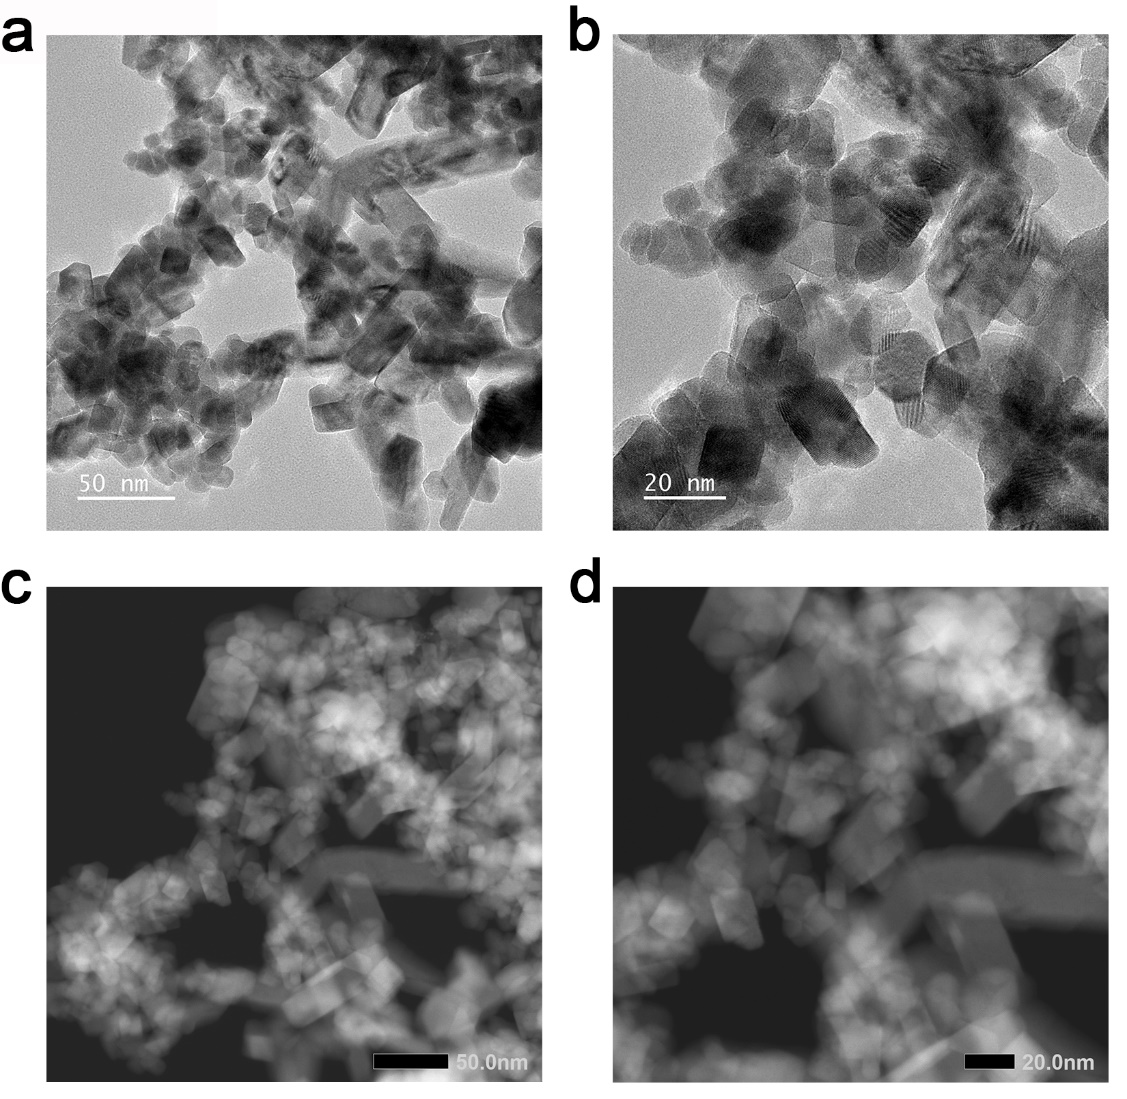


**Supplementary Figure 4. Microscopic images.** (**a, b**) TEM, and (**c, d**) HAADF-STEM images of Com-RuO2.


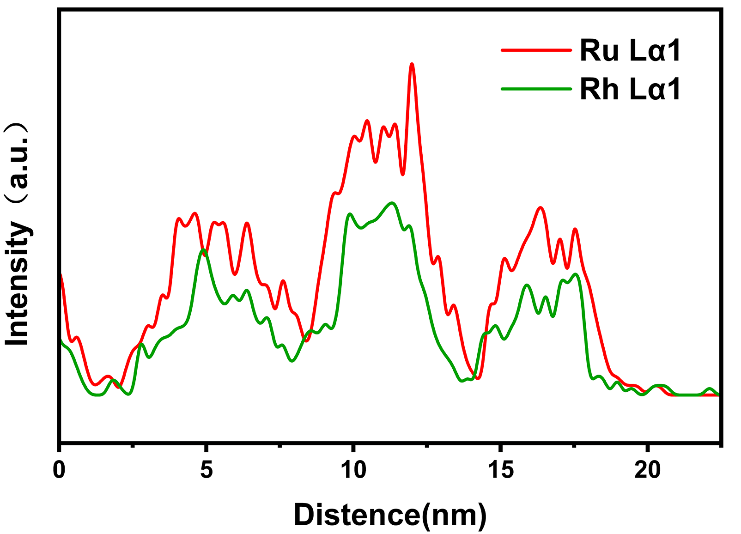


**Supplementary Figure 5. line-scan analysis**. Line-scan analysis corresponds to the part passed by the yellow arrow in Fig. 1f, indicating that Ru and Rh are evenly distributed.


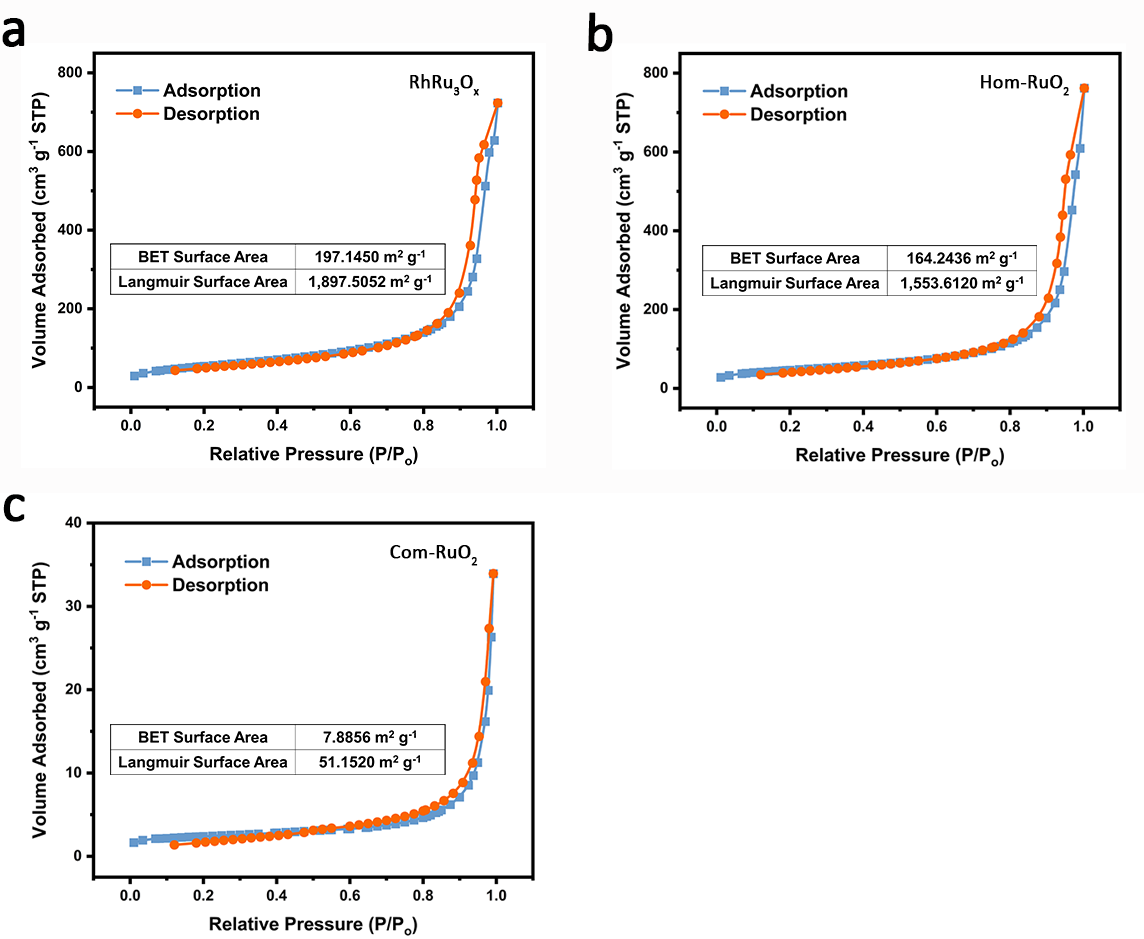


**Supplementary Figure 6. N2 adsorption/desorption isotherms of catalysts.** (**a**) RhRu3Ox. (**b**) Hom-RuO2. (**c**) Com-RuO2. STP, standard temperature and pressure. The BET surface area and Langmuir surface area of each sample are shown in the inset table. The BET surface area of RhRu3Ox, Hom-RuO2 and Com-RuO2 are 197.1450, 164.2436 and 7.8856 m2 g-1, respectively. The Langmuir surface area of RhRu3Ox, Hom-RuO2 and Com-RuO2 are 1,897.5052, 1,553.6120 and 51.1520 m2 g-1, respectively.


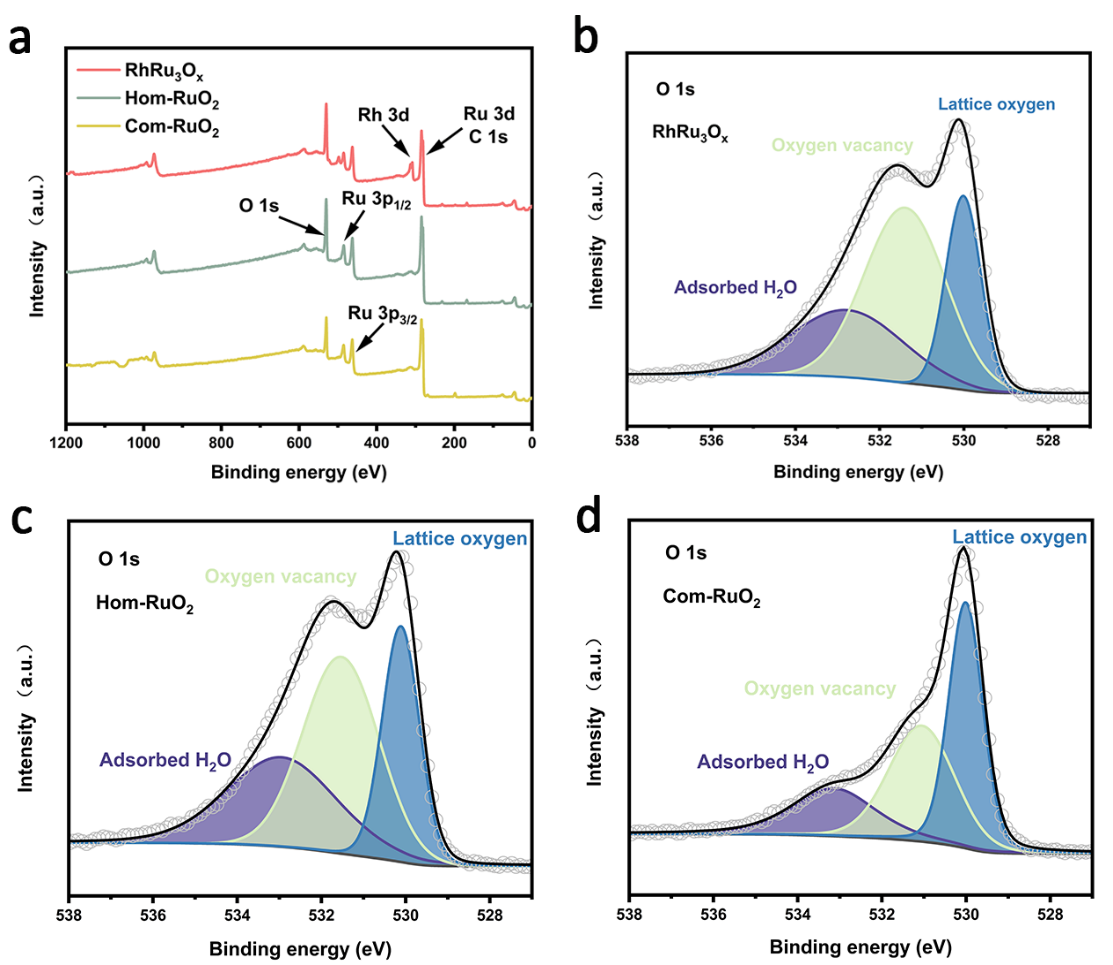


**Supplementary Figure 7. XPS spectra of catalysts.** (**a**) XPS survey spectra of RhRu3Ox, Hom-RuO2 and Com-RuO2. High-resolution O 1s spectra for RhRu3Ox (**b**), Hom-RuO2 (**c**) and Com-RuO2 (**d**). The peaks at 533.0, 531.5, and 530.1 eV are lattice oxygen (OL), oxygen vacancy (OV), and adsorbed water1-3, respectively.


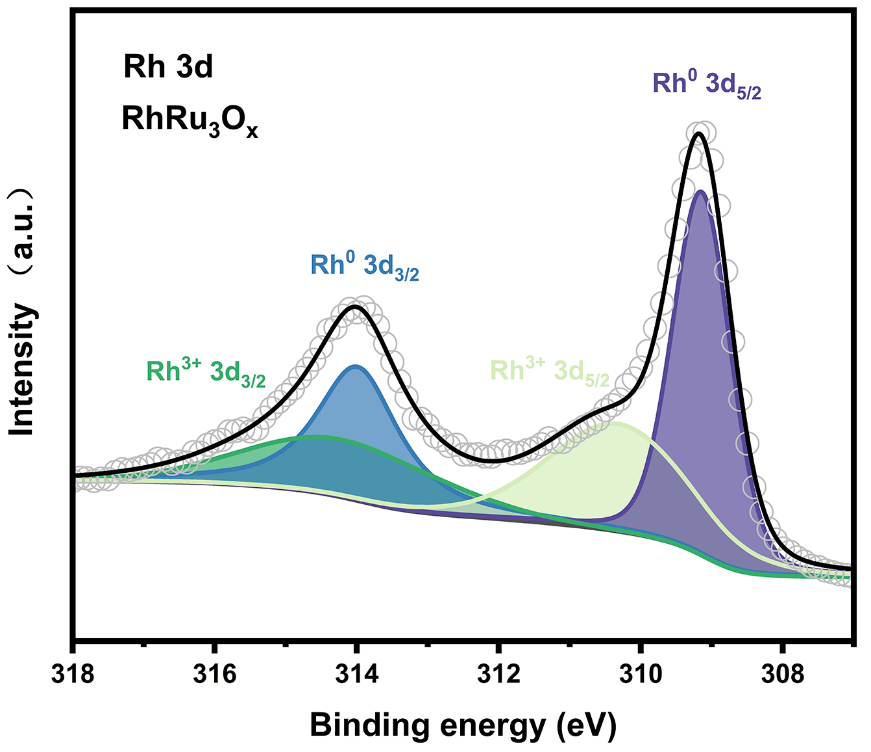


**Supplementary Figure 8. High-resolution Rh 3d XPS spectrum of RhRu3Ox.** There are two peaks at 314.0and 309.2 eV, corresponding to Rh0 3d3/2 and 3d5/2. and the peak at 314.6 and 310.4 eV can be attributed to Rh3+ 3d3/2 and 3d5/24,5.


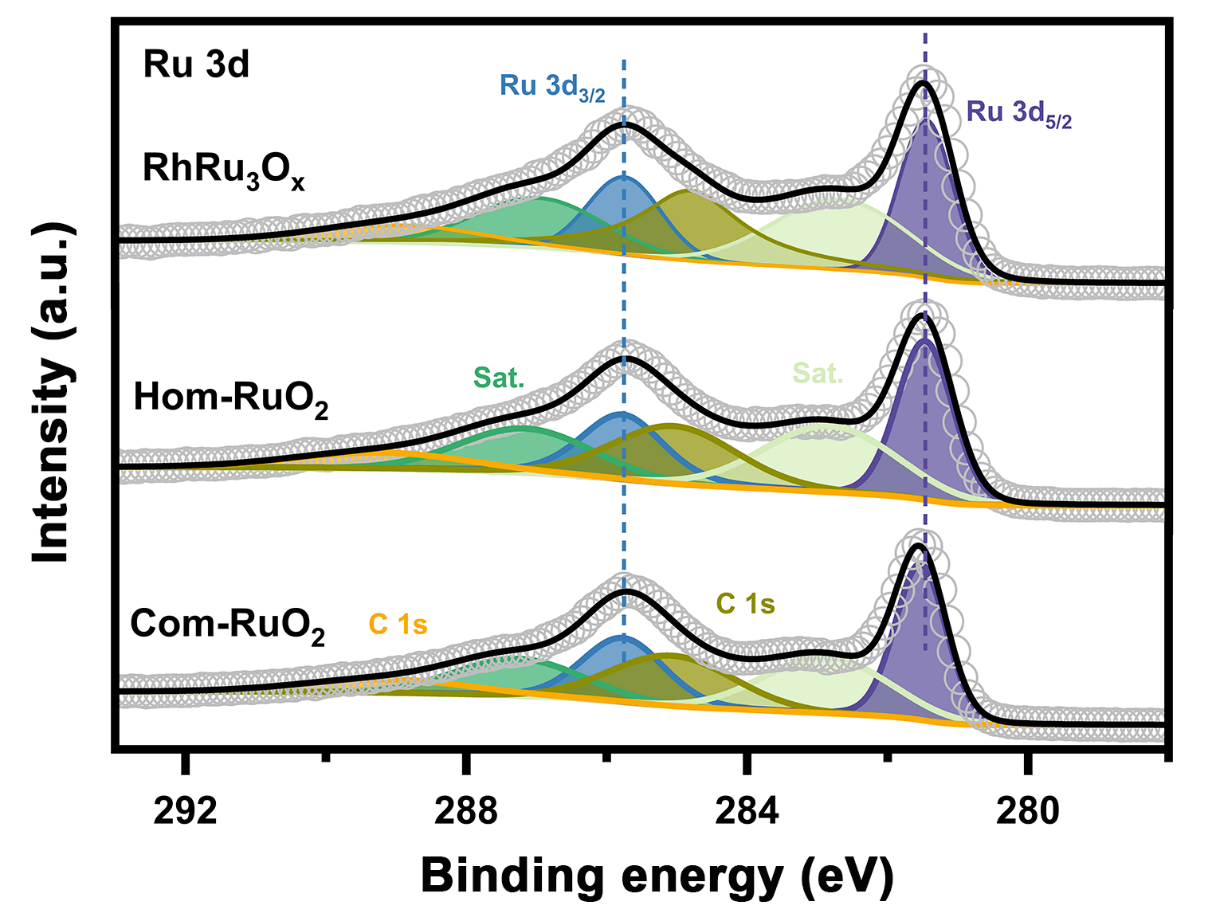


**Supplementary Figure 9. High-resolution Ru 3d XPS spectrum of catalysts.** The peaks observed around 285.8 and 281.5 eV corresponding to Ru4+ 3d3/2 and 3d5/2, and the peaks observed around 287.2 and 282.9 eV can be attribute to their accompanying satellites6,7. The C 1s peek observed in the sample is due to the carbon bands used in the XPS test8. Compared to Hom-RuO2, the binding energies of Ru4+ 3d3/2 and 3d5/2 in RhRu3Ox show a slight negative shift, which indicates that the Ru oxidation state on the surface of RhRu3Ox is slightly lower than that in Hom-RuO2 and Com-RuO2.


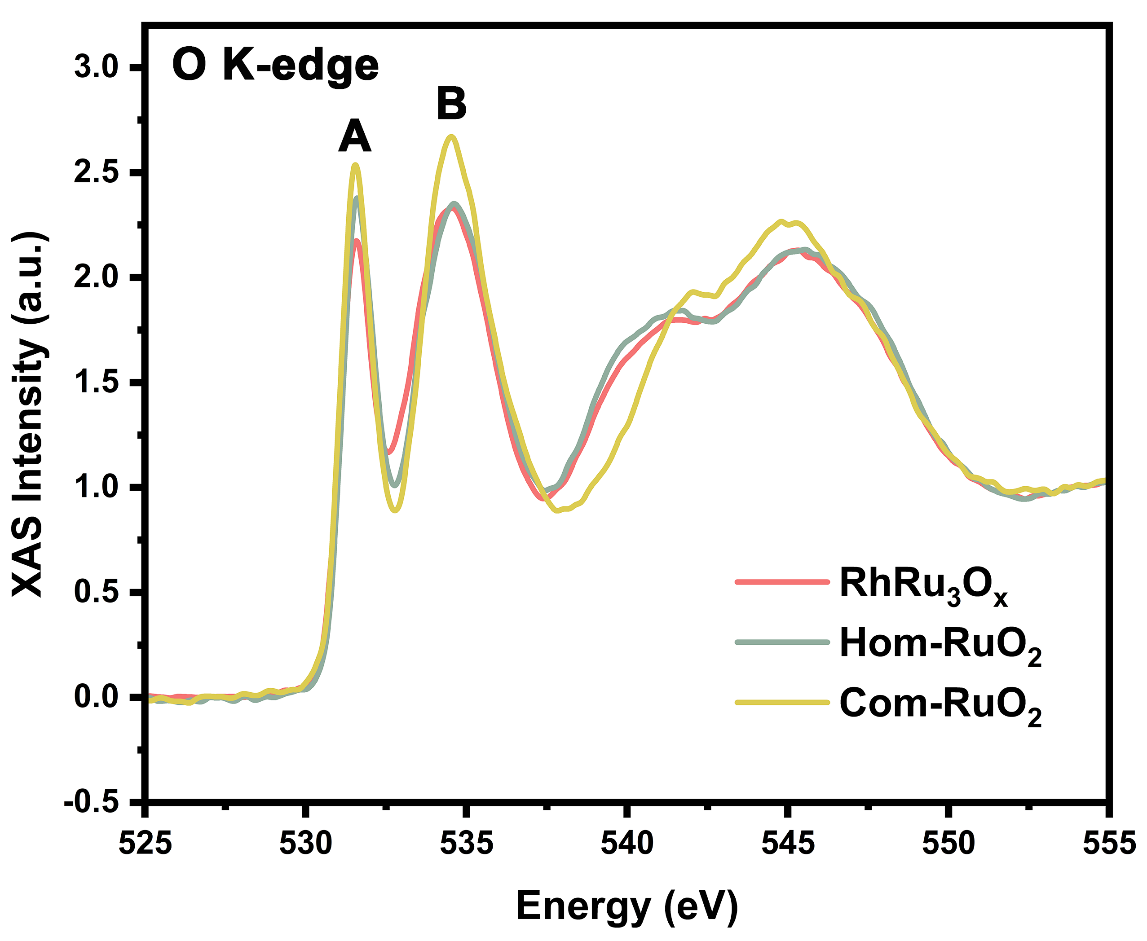


**Supplementary Figure 10. XAS spectra of RhRu3Ox, Hom-RuO2 and Com-RuO2 at O K-edge.** Sharp peak A (531.5eV) represents the electronic transitions from O 1s to unoccupied O 2p-Ru 4d­­­_t2g hybridized orbitals, and Sharp peak B (534.5eV) represents the transition from O 1s to unoccupied O 2p-Ru 4d_eg hybridized orbitals. The A peak intensity of RhRu3Ox is lower than that of Hom-RuO2 and Com-RuO2, which means that the metal atoms in RhRu3Ox occupy more 4d orbital electrons and have fewer empty orbitals, which is consistent with the conclusion that the oxidation state of Ru in RhRu3Ox is the lowest in XPS.


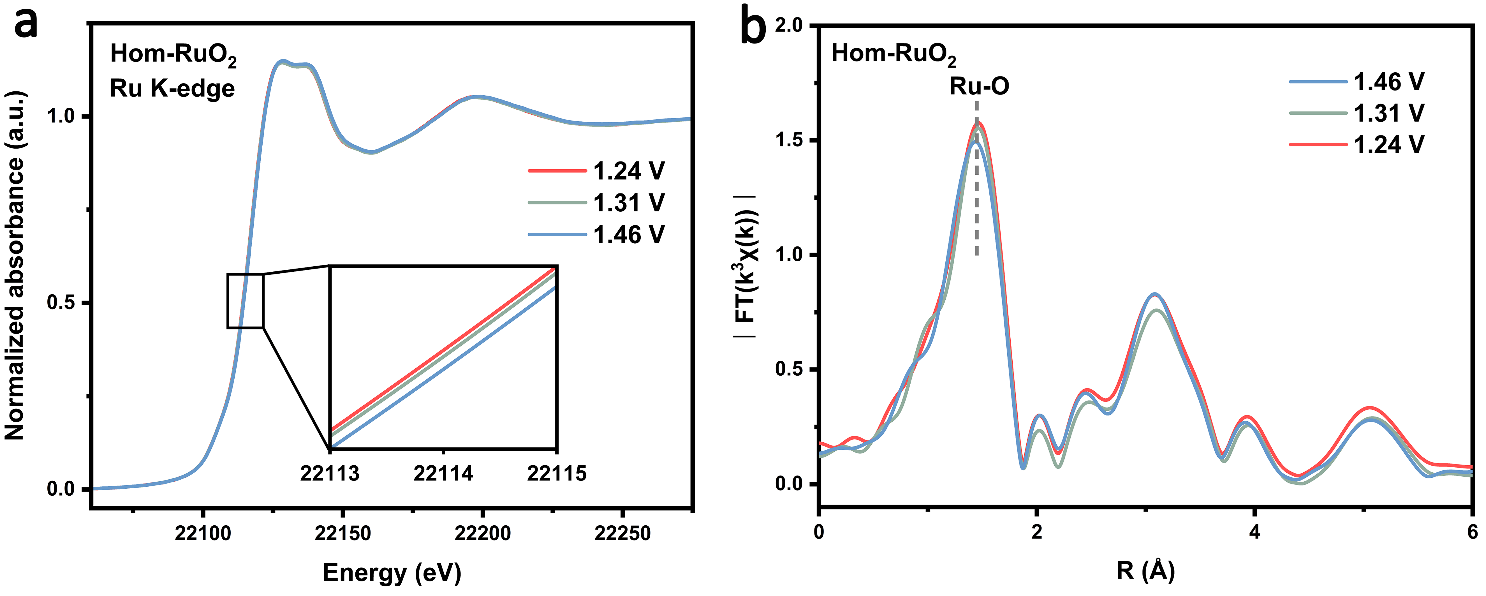


**Supplementary Figure 11. Operando XAS spectra of Hom-RuO2** **during the OER.** **a,b,** Operando XANES (**a**) and EXAFS (**b**) spectra of Hom-RuO2 at the Ru K-edge. The black rectangle inserted in (**a**) shows the magnified Operando spectrum.


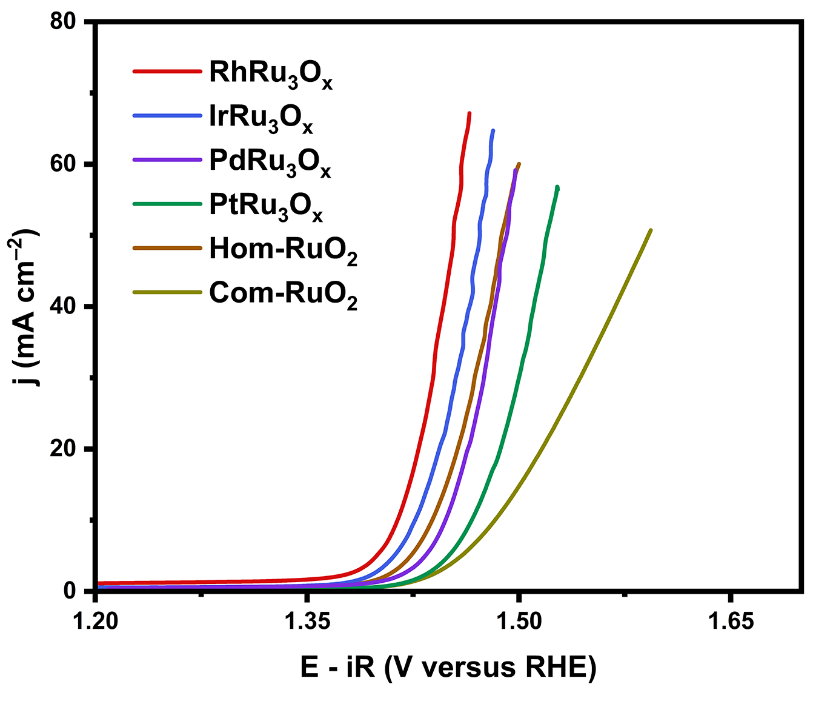


**Supplementary Figure 12. OER activity of catalysts on RDE in 0.1 M HClO4.** LSV curve of RhRu3Ox, IrRu3Ox, PdRu3Ox, PtRu3Ox, Hom-RuO2 and Com-RuO2.


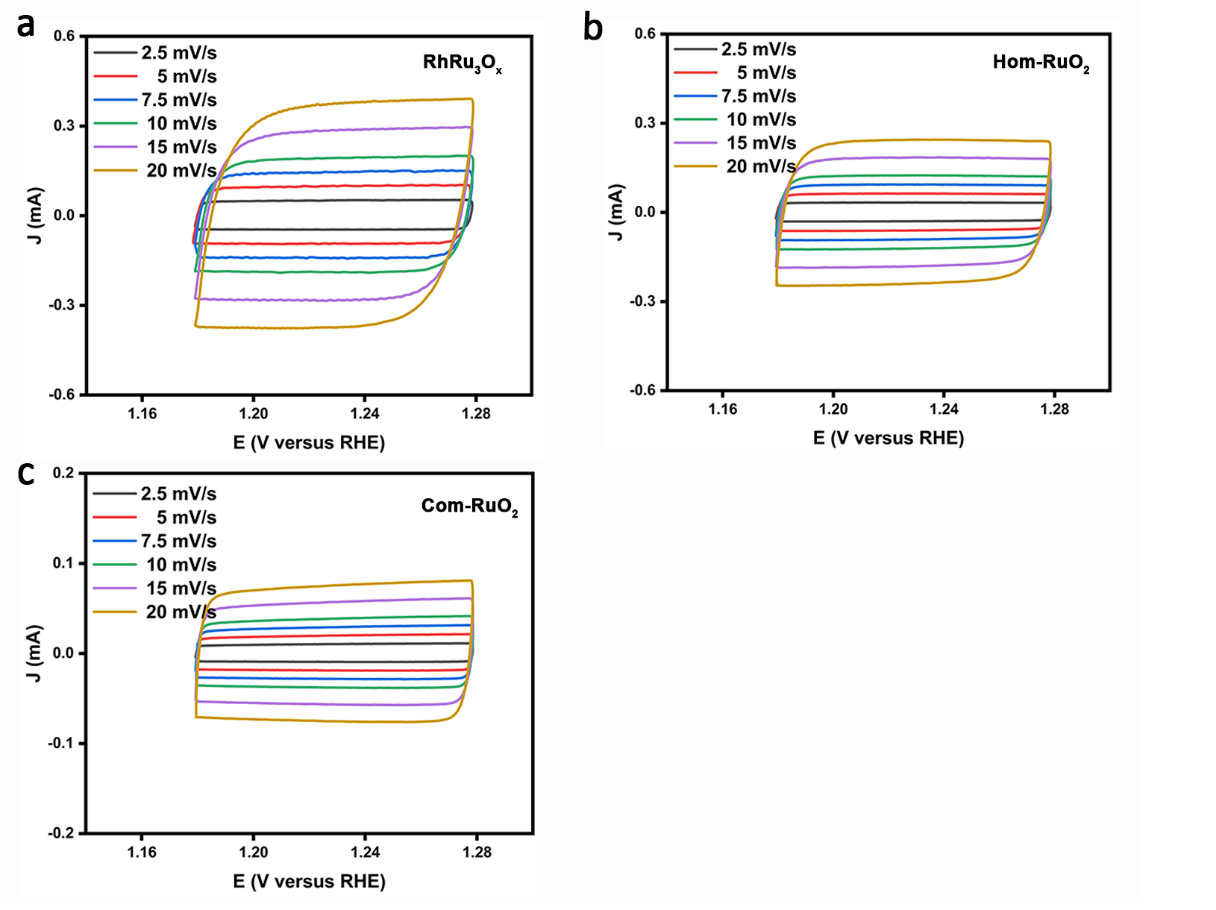


**Supplementary Figure 13. Cdl measurement.** CV curves of (**a**) RhRu3Ox, (**b**) Hom-RuO2 and (**c**) Com-RuO2 collected in the non-faradic current range at scan rates of 2.5, 5, 7.5, 10, 15 and 20 mV/s in 0.1 M HClO4 electrolyte.


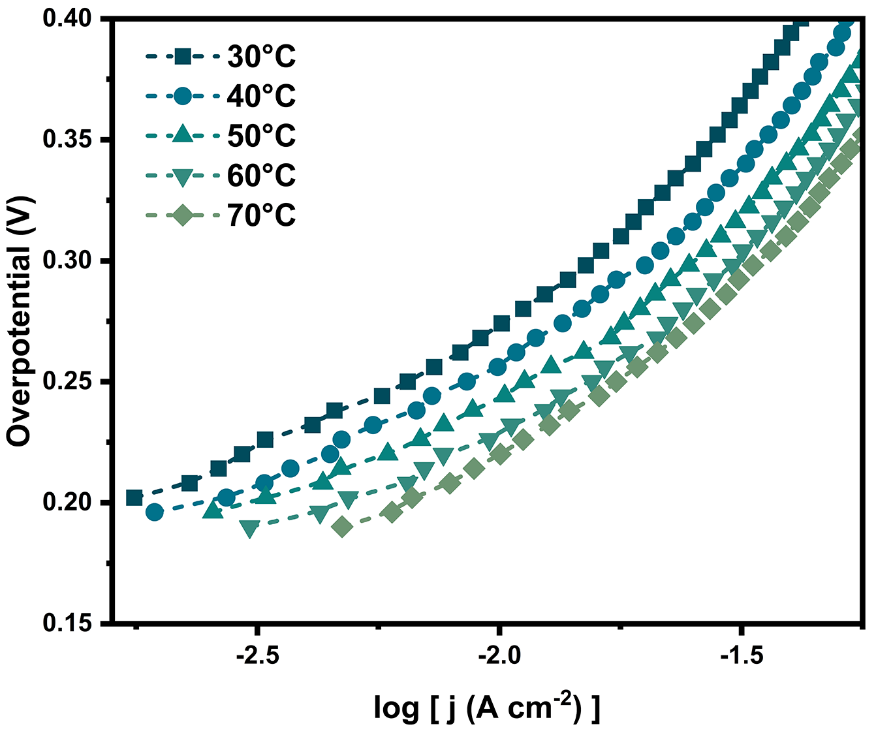


**Supplementary Figure 14. Tafel plots of Hom-RuO2 at different temperatures.**


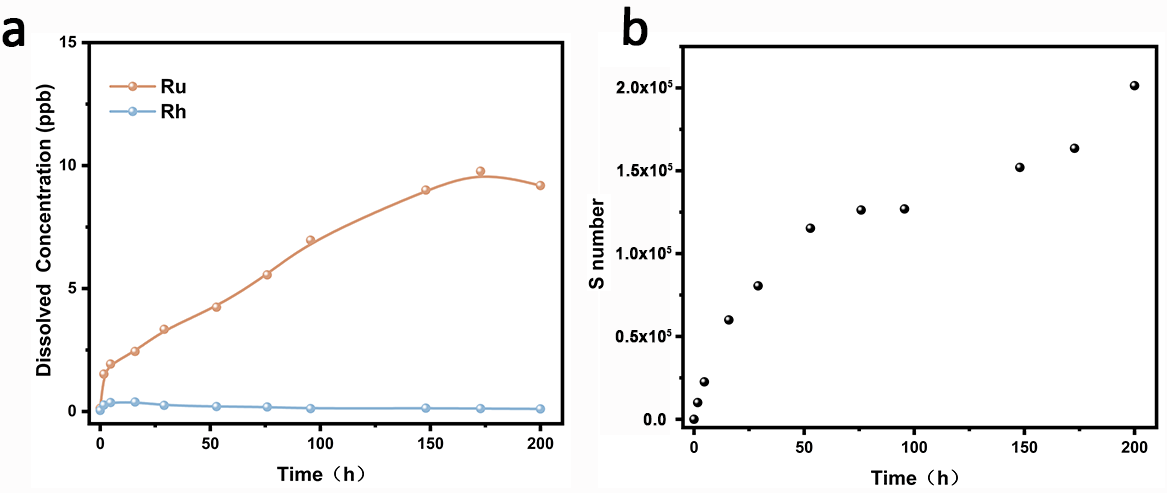


**Supplementary Figure 15. Stability evaluation.** (**a**)The dissolution of Ru and Rh during RhRu3Ox stability test on RDE. The volume of electrolytic liquid in RDE test was 200 mL. (**b**) S numbers of RhRu3Ox during the stability test.

**Supplementary Note 1:**

The calculation formula is as follows:

=

= = = =

=

= = = 2.57


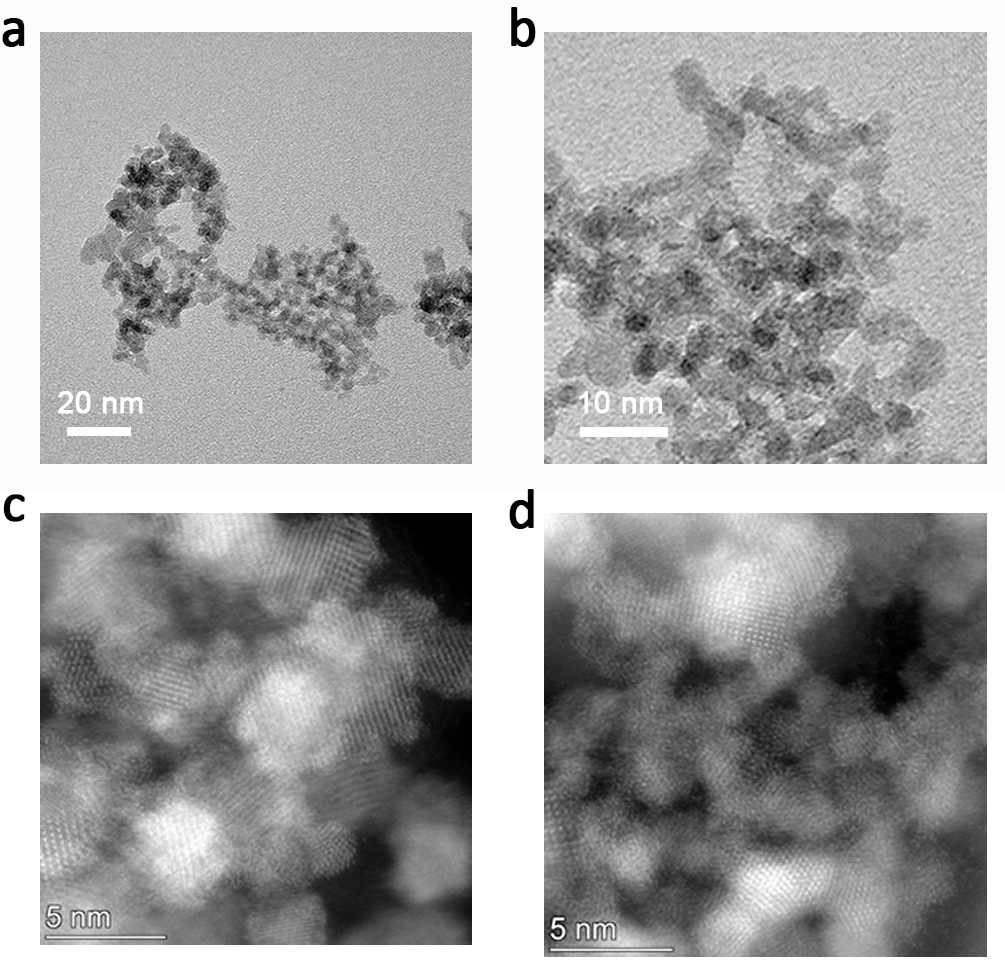


**Supplementary Figure 16. Microscopic images.** (**a, b**) TEM, and (**c, d**) HADDF-STEM images of RhRu3Ox after stability test in RDE.


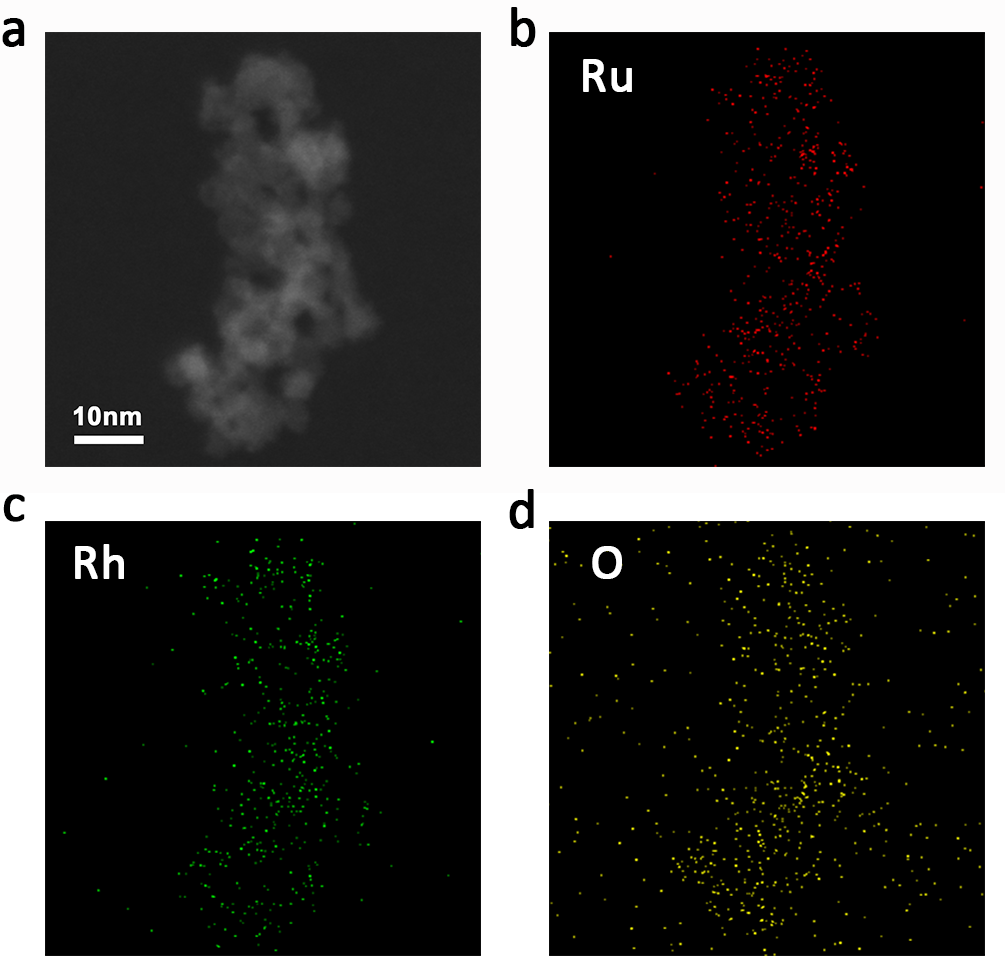


**Supplementary Figure 17. HAADF image and corresponding EDS elem ental mapping images of RhRu3Ox after stability test in RDE.**


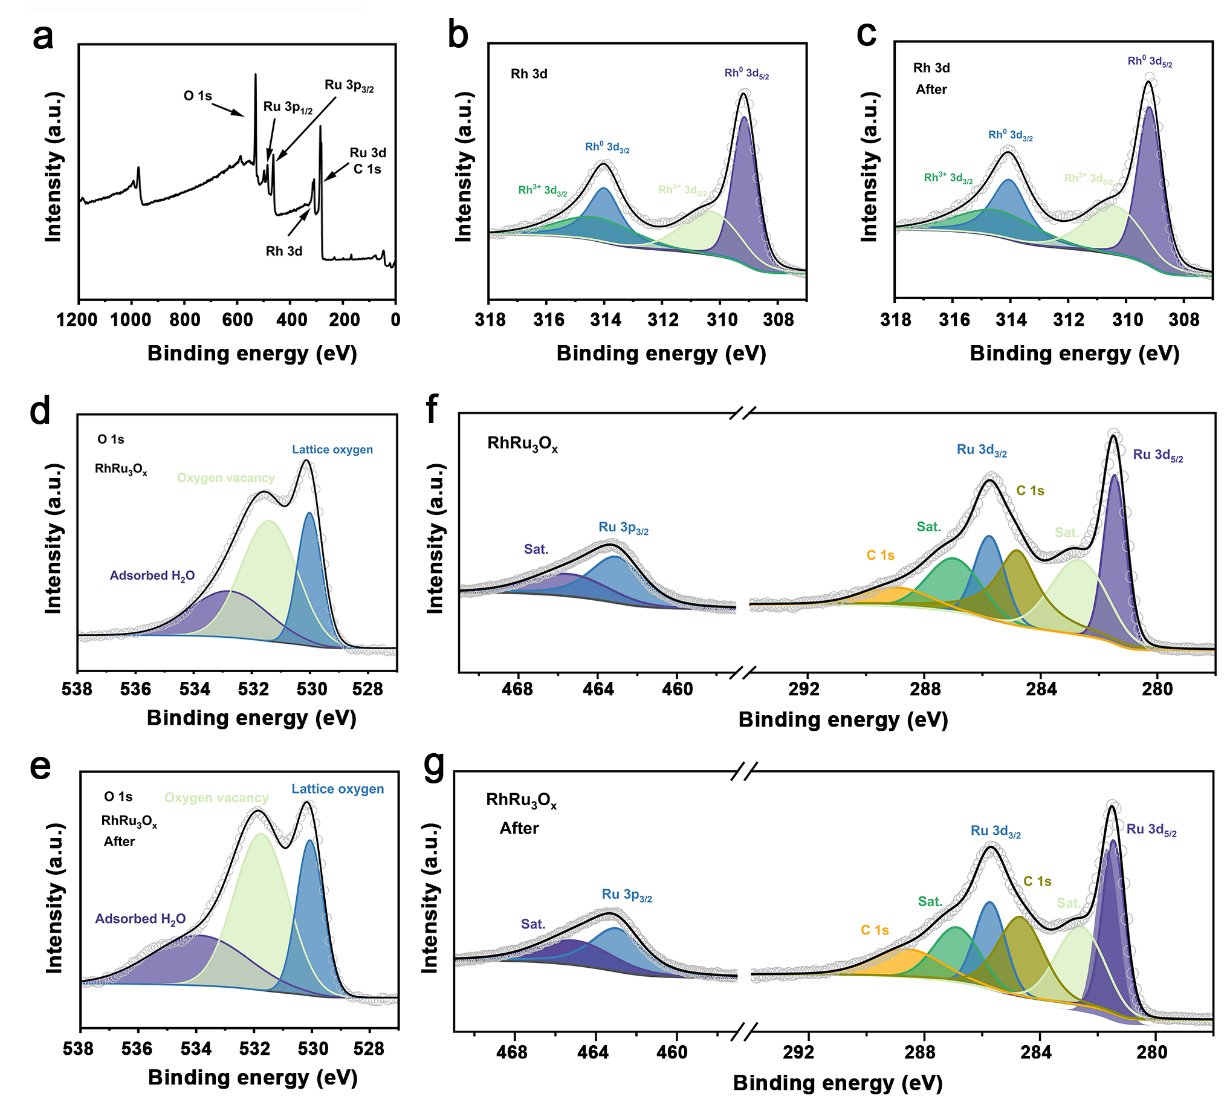


**Supplementary Figure 18. XPS spectra of catalysts.** (**a**) XPS survey spectra of RhRu3Ox after stability test in RDE. Hom-RuO2 and Com-RuO2. High-resolution Rh 3d spectra for RhRu3Ox before (**b**) and after (**c**) stability test in RDE. High-resolution O 1s spectra for RhRu3Ox before (**d**) and after (**e**) stability test in RDE. High-resolution Ru 3d and Ru 3p3/2 spectra for RhRu3Ox before (**f**) and after (**g**) stability test in RDE.


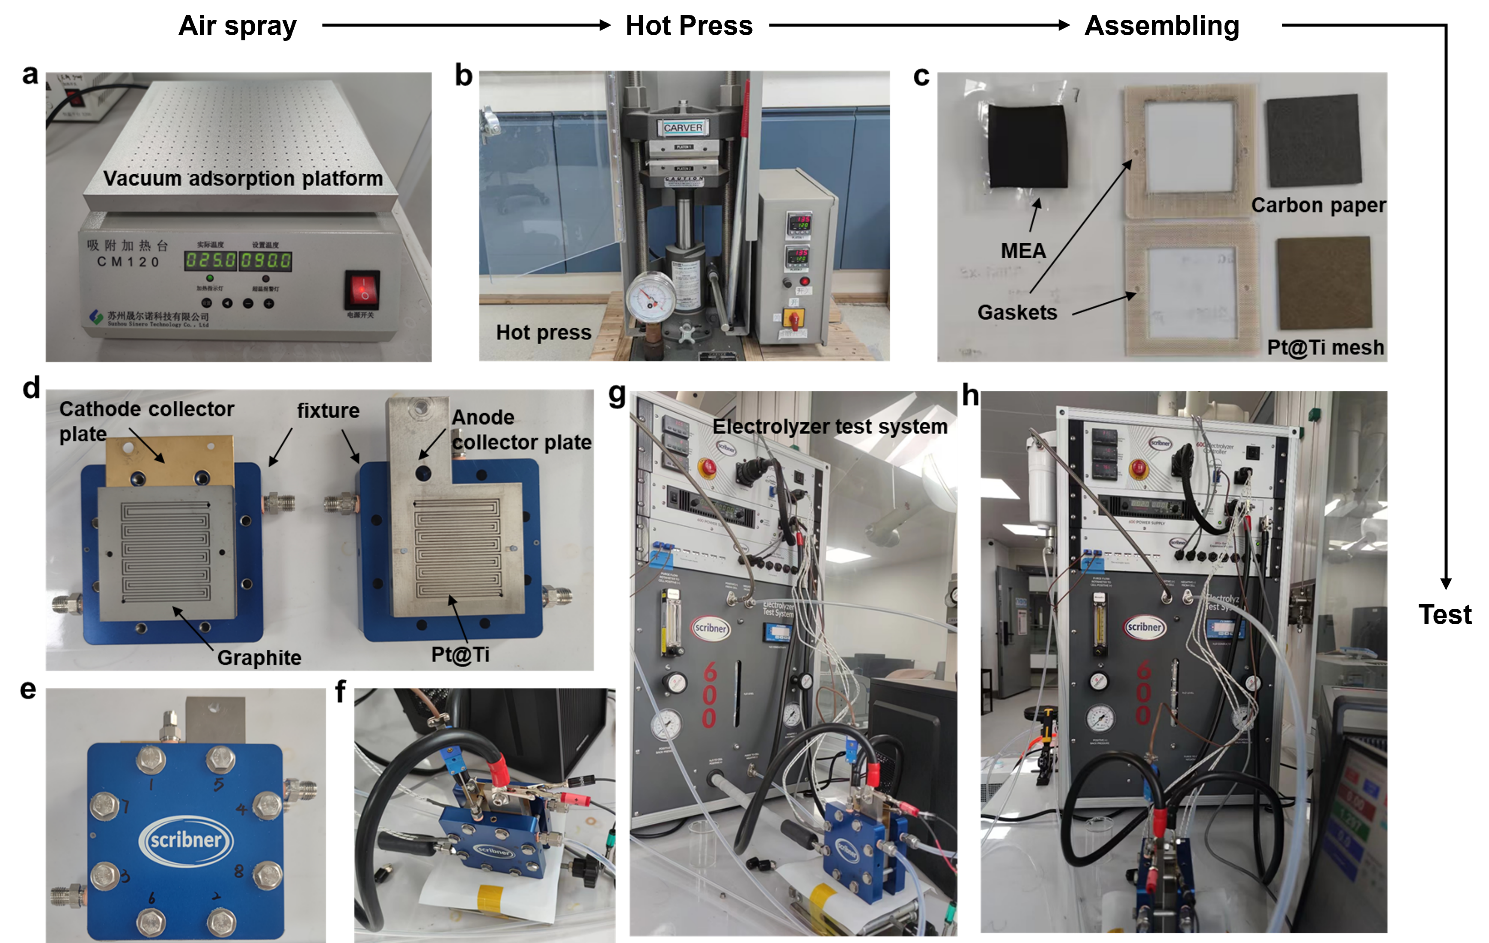


**Supplementary Figure 19. Flow diagram of membrane electrode assembly fabrication and PEM-WE device assembly.** (**a**)The vacuum adsorptin platform. (**b**) Hot press equipment. (**c**) MEA, gaskets and PTL. (**d**) Fluid fields and end plates. (**e,f**) The assembled electrolyzer. (**g,h**) Integrated PEM electrolytic test system.


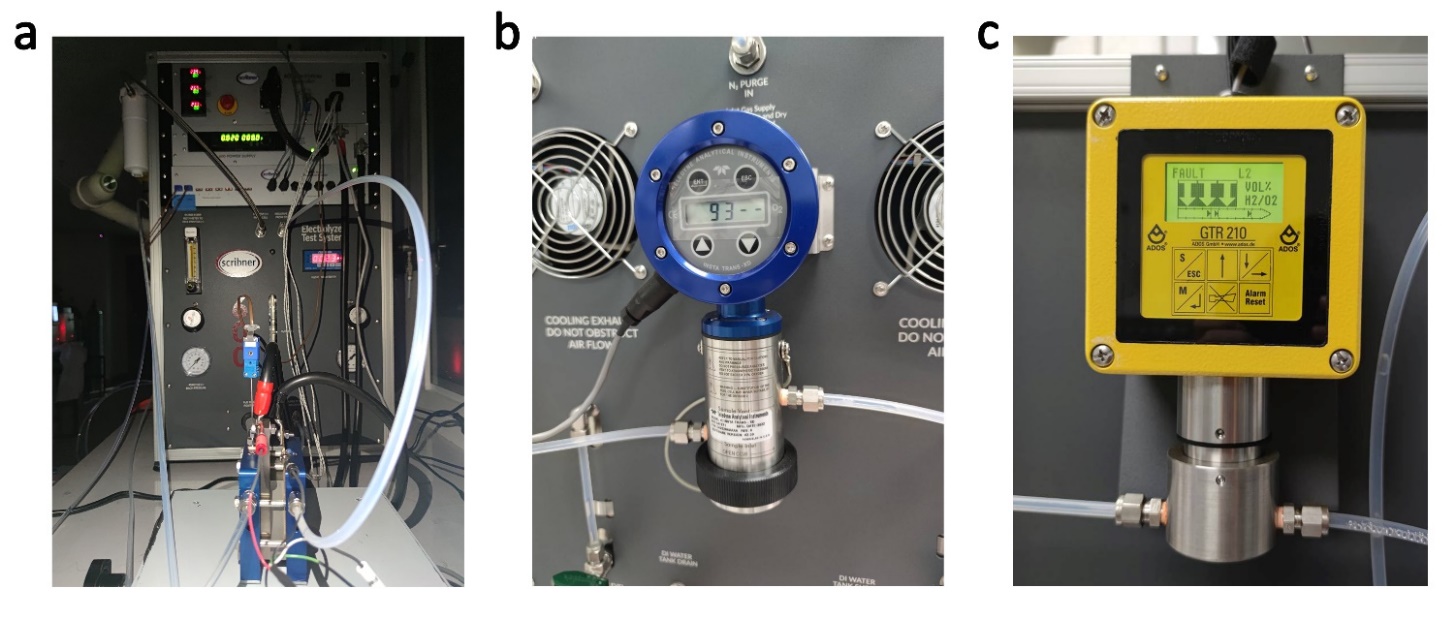


**Supplementary Figure 20. Photograph of the integrated PEM electrolytic test system used in this work.** (**a**)The front side of our integrated PEM Electrolysis Test System. (**b**) The Teledyne analytical instrument InstaTrans-XD O2 transmitter (O2 detector) on the back side of our Test System. (**c**) The ADOS GTR 196 H2 transmitter (H2 detector) on the left side of our Test System.

**Supplementary Note 2:**

**The configuration used for the PEM-WE test in this work.**

• Model 600 electrolytic cell test system

• Pressure (4-5 bar, 60-75 PSI) high purity purge gas (N2 > 99.9%)

• Pressure source (2-4.5 bar, 30-65 PSI), high purity water (18 MΩ*cm)

• Electrolysis cell test fixture

• Uninterrupted power supply (Capacity: 3kVA/2.7Kw, AC output: 220VAC, 50Hz, 13.7A)

**Supplementary Note 3:**

**Electrolyzer test fixture electrical connections.**

The 600 ETS electrical connection consists of a set of heavy cables for transmitting cell current and independent sense lead connections to measure the voltage of the cell. For accurate measurement, the Leads must be connected directly to the cell terminal. All cells have at least four electrical connections: negative electrode voltage and current, and positive electrode voltage and current. Independent current and voltage inputs are provided for accurately measure the voltage of the cell end plates or current collectors. To be specific, connect the cathode (I-) and anode (I+) current leads of the cell (i.e., the load cable) to the negative and positive end plates of the cell (i.e., the collector), respectively. Then connect the whole cell cathode voltage (V-) and whole cell anode voltage (V+) sense leads to the negative end plate and positive end plate (collector) of the cell respectively. The auxiliary sense leads should be suspended in this configuration to avoid contact with any conductor. It is very important that these leads be used and connected properly. Cell voltage and internal resistance measurements are taken between the sense leads, so their placement on the cell end plates will affect the actual readings.

**Supplementary Note 4:**

**Assembly instructions for standard fluid interface metal pipe fittings and fixing instructions for fixtures.**

First, insert the oil pipe into the pipe fitting to ensure that the oil pipe is firmly fixed on the shoulder of the pipe body, and the nut is tightened. Then carve the nut in any position, while maintaining the stability of the accessory body, turn 90 degrees counterclockwise to tighten the nut. The eight bolts of the fixture are tightened diagonally using a torque wrench (DB12N5-S, Tohnichi Mfg. Co.). First tighten the eight bolts with 2 N·m of torque, then increase by 1 N·m in turn, and finally increase to 5 N·m to complete the fixation.

**Supplementary Note 5:**

**Measures to ensure gas purity and safety.**

In order to ensure the purity of the generated H2 and O2 and the safety of the experiment. The Teledyne analytical instrument InstaTrans-XD O2 transmitter is installed at the cathode outlet to monitor the O2 concentration in product H2 (Supplementary Fig. 21b). The ADOS GTR 196 H2 transmitter is installed at the anode outlet to monitor the concentration of H2 in the product O2 (Supplementary Fig. 21c). A four-pin circular external alarm input connector is connected to an external alarm source, such as a combustible (H2) gas sensor or other device with a normally closed relay contact output. This will cause the system to shut down automatically. This ensures that the gas product (O2) purity of all data reported in this work is greater than 99.8%.


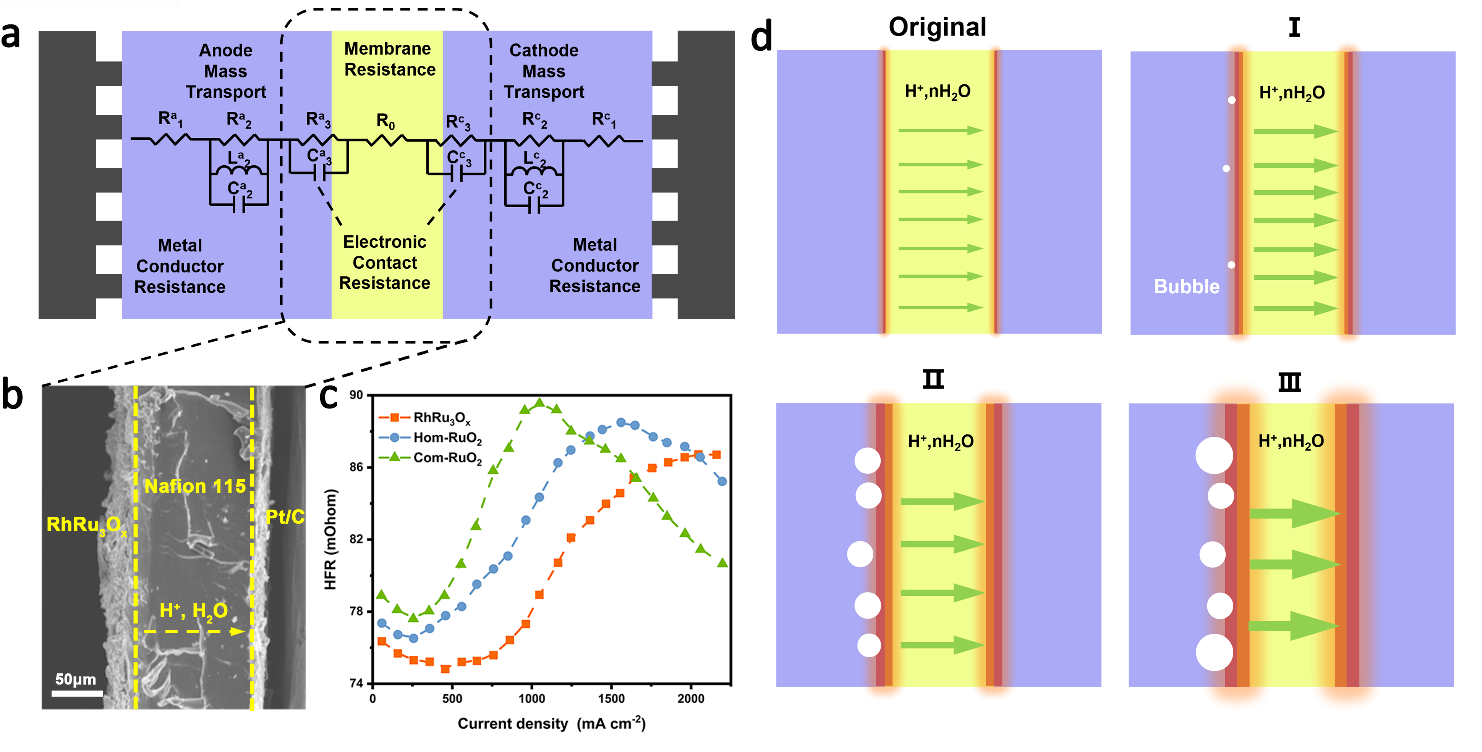


**Supplementary Figure 21. Equivalent circuit and J-HFR curve of the PEM electrolyzer using RhRu3Ox, Hom-RuO2 or Com-RuO2 as anodic catalyst.** (**a**)Associated equivalent electrical circuit of PEM-WE. (**b**) Cross-sectional SEM of our MEA. (**c**) Current density vs. high frequency resistance obtained by integrated electrolysis system. (**d**) Diagram of possible interpretations of the J-HFR curve in (c). The J-HFR curve is divided into three stages, Ⅰ is the stage of curve decline, Ⅱ is the stage of curve rise, and Ⅲ is the stage of continuous decline after reaching the peak.

**Supplementary Note 6:**

The meaning of different circuit component symbols:

R0 (Ω·cm2): membrane resistance.

Ra1 and Rc1 (Ω·cm2): electronic resistance of electron conducting metallic cell components at anode and cathode respectively.

Za (Ω·cm2): anodic diffusion impedance due to O2 transport away from the anode and/or to H2O transport to the anode. Za = Ra2 + La2 + Ca2.

Zc (Ω·cm2): cathodic diffusion impedance due to H2 transport away from the cathode. Zc = Rc2 + Lc2 + Cc2.

Ra3 and Rc3 (Ω·cm2): electronic contact resistance at anode and cathode respectively.

Qa3 (F·cm-2·sn-1): anodic constant phase element of the anode/electrolyte interface; n is related to the rotation Angle of the pure capacitance line on a complex planar plot.

Qc3 (F·cm-2·sn-1): cathodic constant phase element of the cathode/electrolyte interface.

**Supplementary Note 7:**

As reported previously, the HFR represents the sum of electronic contact resistance and membrane resistance9, and the increase of current density will lead to two diametrically opposite changes in HFR values (Supplementary Figure 21a,b). The first is that the increase of current density will generate more heat, resulting in a local temperature increase at the electrode/membrane interface, so that the ionic conductivity of the membrane increases, manifested as a decrease in HFR value, but this is essentially achieved through other energy dissipation10; The second is that at high current density, the water flow caused by electroosmotic drag increases (The electroosmotic drag coefficient is defined as the number of water molecules per proton transferred through the membrane in the case of a vanishing gradient in the chemical potential of H2O), resulting in a decrease in the water content in the area near the membrane anode, which is represented by an increase in the HFR value11. Therefore, the HFR value gradually shifted to the right with Com-RuO2, Hom-RuO2, RhRu3Ox, indicating that the mass transfer resistance of the catalyst layer composed of RhRu3Ox was the lowest among the three (Supplementary Figure 21c). Based on the above understanding, we believe that the J-HFR curve presents a phenomenon of first decreasing, then increasing, and then decreasing, because in the initial stage, the anode water supply is sufficient, and the ion conductivity of the membrane dominates the HFR value. After that, the decrease of water content near the membrane anode limited the further decrease of HFR value. Finally, the decrease in HFR value caused by the increase in ionic conductivity gradually compensated for the increase in HFR value caused by the decrease in water content, and gradually dominated the HFR value again (Supplementary Figure 21d).


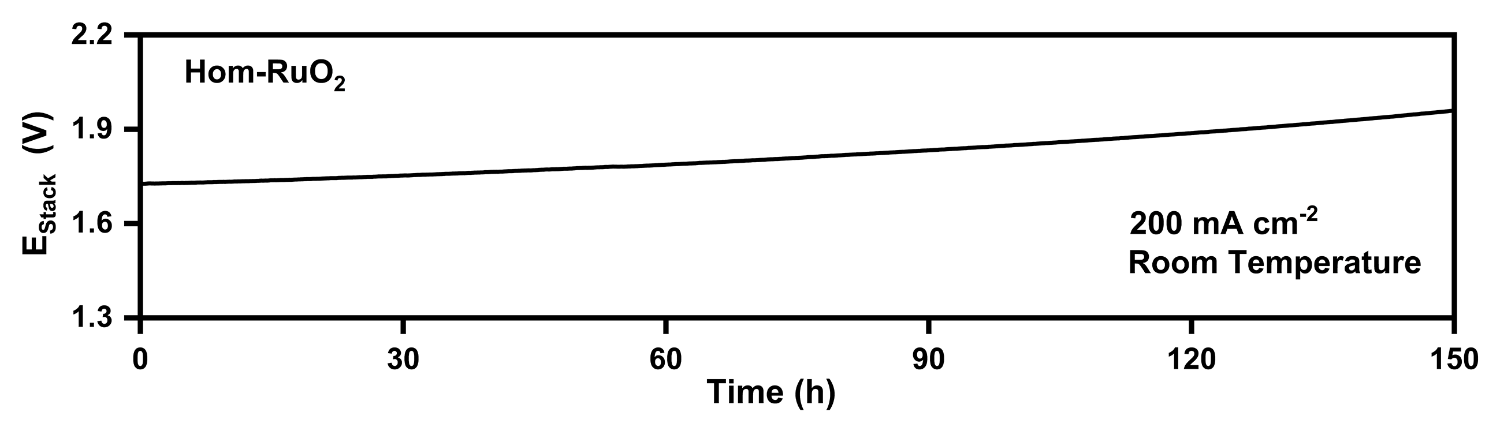


**Supplementary Figure 22. Stability test of Hom-RuO2.** Chronopotentiometry curve of the PEM electrolyzer using Hom-RuO2 as anodic catalyst and Pt/C as the cathode catalyst operated at 200 mA cm-2 at room temperature with Nafion 115 membrane.


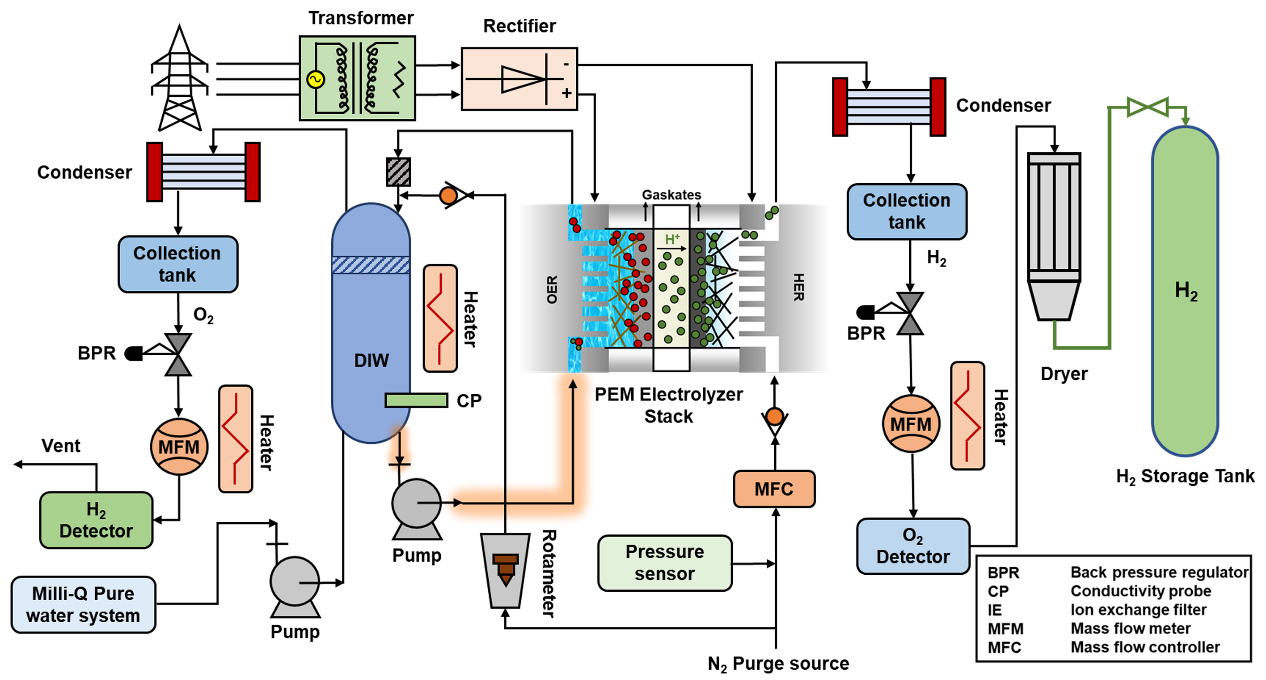


**Supplementary Figure 23. The specific flow diagram of our integrated PEM electrolytic test system.**

**Supplementary Note 8:**

**Hydrogen production cost estimation using commercial RuO2 and RhRu3Ox as anode materials in PEM-WE devices.**

Turnover frequency (TOF)

To estimate the turnover frequency of RhRu3Ox and RuO2 catalysts in the PEM-WE device, we assume that the Faraday efficiency of OER is 100% and we assume all units of RhRu3Ox and RuO2 are active for the OER12.

| Current density (electrolyzer)  RhRu3Ox loading  RhRu3Ox (Rh0.25Ru0.75O2) molecular weight  RuO2 loading  RuO2 molecular weight | = 0.2 A·cm-2  = 3.0 mg·cm-2  = 224.2 g·mol-1  = 3.0 mg·cm-2  = 133.1 g·mol-1 |
| --- | --- |

Elementary charge = 1.602 x 10-19 C

Faraday’s constant, F= 96500 C mol-1

Avogadro’s number = 6.022 x 1023 mol-1

Reaction: 2H2O – 4e- → O2 + 4H+

O2 production per second @ 0.2 A·cm-2 = (j A·cm-2)(1 e- / 1.602 x 10-19 C)(1 O2 / 4e-)

= 0.2 A·cm-2 / (1.602 x 10-19 C x 4)

= 3.125 x 1017 O2·cm-2·s-1

Loading RhRu3Ox = 3 x 10-3 g·cm-2

Loading (mols)of RhRu3Ox = 3 x 10-3 g·cm-2 / 224.2 g·mol-1

= 1.338 x 10-5 mol·cm-2

= 1.338 x 10-5 mol·cm-2 x 6.022 x 1023 mol-1

= 8.057 x 1018 RhRu3Ox units·cm-2

RhRu3Ox TOF = O2 production rate / number of RhRu3Ox sites

= (3.125 x 1017 O2·cm-2·s-1) / 8.057 x 1018 RhRu3Ox units·cm-2

= 0.03878 O2·s-1 (assuming all RhRu3Ox units active)

= 0.07756 H2·s-1

Loading RuO2 = 3 x 10-3 g·cm-2

Loading (mols) of RuO2 = 3 x 10-3 g·cm-2 / 133.1 g·mol-1

= 2.25 x 10-5 mol·cm-2

= 2.25 x 10-5 mol·cm-2 x 6.022 x 1023 mol-1

= 1.357 x 1019 RuO2 units·cm-2

RuO2 TOF = O2 production rate / number of RuO2 sites

= (3.125 x 1017 O2·cm-2·s-1) / 1.357 x 1019 RuO2 units·cm-2

= 0.02303 O2·s-1 (assuming all RuO2 units active)

= 0.04606 H2·s-1

Membrane Electrode Assembly Efficiency

The lower heating value (LHV) of hydrogen is used to determine the efficiency of the MEA for each PEM-WE device.

O2 production rate @ 0.2 A·cm-2 = (j A·cm-2 )(1 e-/1.602 x 10-19 C)(1 O2/4e-)

= 0.2 A·cm-2 /(1.602 x 10-19 C x 4)

= 3.125 x 1017 O2·cm-2·s-1

H2 production rate @ 0.2 A·cm-2 = 3.125 x 1017 O2·cm-2·s-1 x 2

=6.25 x 1017 H2·cm-2·s-1 / 6.022 x 1023 mol-1

= 1.04 x 10-6 mol H2·cm-2·s-1

LHV for H2 = 120 kJ·g-1 H2 x 2 g·mol-1

= 2.4 x 105 J·mol-1 H2

H2 Power Out = (1.04 x 10-6 mol H2·cm-2·s-1)·( 2.4 x 105 J·mol-1 H2)

= 0.2496 W·cm-2

Electrolyzer Power (RhRu3Ox) @ 0.2 A·cm-2 = (0.2 A·cm-2)·(1.61 V)

= 0.322 W·cm-2

Electrolyzer Power (RuO2) @ 0.2 A·cm-2 = (0.2 A·cm-2)·(1.84 V)

= 0.368 W·cm-2

Energy Conversion Efficiency = (H2 Power Out) / (Electrolyzer Power)

Efficiency of RhRu3Ox - based PEM = (0.2496 W·cm-2) / (0.322 W·cm-2)

= 77.5%

Efficiency of RuO2 - based PEM = (0.2496 W·cm-2) / (0.368 W·cm-2)

= 67.8%

Hydrogen production cost estimation

Specific sample for calculating the cost of hydrogen production by water splitting:

Taking the 50-ton daily capacity of H2 as an example at a current density of 0.2 A cm-2. At the current density of 0.2 A cm-2, the operating voltage of RhRu3Ox is 1.61V and Com-RuO2 is 1.84V.

The specific assumptions made for the TEA are listed as follows:

1. According to the International Renewable Energy Agency's "Renewable Energy Generation Costs in 2022", The global weighted-average levelized cost of electricity (LCOE)13 for solar photovoltaic is 0.049$ kWh-1, onshore wind is 0.033$ kWh-1, and offshore wind is 0.081$ kWh-1. Here we take the LOCE for solar photovoltaic, that is, the electricity price of 0.049$ kWh-1 as an example.
2. Using a 200 kW PEM system as an example, the cost of a PEM stack is 686 $ kW-1, with PTL accounting for about 17%-25% of the stack cost, bipolar plates about 12%-21%, and end plates and assembly about 3%-13%14. Here, we take the highest cost required for evaluation, with PTL accounting for 25% of the stack cost, bipolar plate about 21%, and end plate and assembly about 13%.
3. CCM uses our own materials, so it needs to be listed separately for evaluation. According to the precious metal futures price in March 2024, platinum is 875.8$ ounce-1 (30.89$ g-1) and ruthenium is 435$ ounce-1 (15.34$ g-1).
4. The anticipated service life of the electrolyzer was set at 5 years and the working time per year was set at 330 days.
5. The cost of Balance of Plant (BOP) was set as 613$ kW-1. The power electronics system accounts for half of the cost of a blowout preventer, while the water cycle and hydrogen treatment subsystems each account for one-fifth of the cost of a blowout preventer. The remaining one-tenth we classify as cooling costs14.

The required total current is calculated as:

*Total Current* = × × × × 4e- × × = 27918113 A

The needed electrolyzer area was determined as:

𝐸𝑙𝑒𝑐𝑡𝑟𝑜𝑙𝑦𝑧𝑒𝑟 𝐴𝑟𝑒𝑎 = 27918113A × × = 13959 m2

The total cost of the proposed water electrolysis process for hydrogen production includes PEM stack costs, operating costs and balance of plant costs.

1. PEM stack cost：
   1. CCM:

The anode load of the CCM prepared by us is 3 mg cm-2, and the cathode load is 0.6 mg cm-2.

Anode: 15.34 $ g-1 × × 13959 m2 × × × × × = 19.466 $ per ton O2 = 77.866 $ per ton H2

Producing 4-ton O2 is equivalent to producing 1-ton H2, so 19.466 $ per ton O2 is equivalent to 77.866 $ per ton H2.

Cathode: 30.89 $ g-1 × × 40% × 13959 m2 × × × × × = 3.136 $ per ton O2 = 12.544 $ per ton H2

- 1. PTL:

686 $ kW-1 ×13959 m2 × 0.2 A cm-2 × 1.61V × × × × × × 25% = 23.36 $ per ton O2 = 93.44 $ per ton H2

- 1. Bipolar Plate:

686 $ kW-1 ×13959 m2 × 0.2 A cm-2 × 1.61V × × × × × × 21% = 19.62 $ per ton O2 = 78.49 $ per ton H2

- 1. End Plate and Assembly:

686 $ kW-1 ×13959 m2 × 0.2 A cm-2 × 1.61V × × × × × × 21% = 12.15 $ per ton O2 = 48.59 $ per ton H2

1. Operating Cost：
   1. Electricity:

27918113 A × 1.61V × × × × 0.049 $ kWh-1 = 264.30 $ per ton O2 = 1057.18 $ per ton H2

1. Balance of Plant：
   1. Power Electronics System:

613 $ kW-1 × 27918113 A × 1.61V × × × × × 50% = 41.75 $ per ton O2 = 166.98 $ per ton H2

- 1. Water Circulation:

613 $ kW-1 × 27918113 A × 1.61V × × × × × 20% = 16.70 $ per ton O2 = 66.80 $ per ton H2

- 1. Hydrogen Processing:

613 $ kW-1 × 27918113 A × 1.61V × × × × × 20% = 16.70 $ per ton O2 = 66.80 $ per ton H2

- 1. Cooling:

613 $ kW-1 × 27918113 A × 1.61V × × × × × 10% = 8.35 $ per ton O2 = 33.40 $ per ton H2

1. The total cost:

RhRu3Ox:

*Total Cost* = 77.87 + 12.54 + 93.44 + 78.49 + 48.59 + 1057.18 + 166.98 + 66.80 + 66.80 + 33.40 = 1702.09 $ per ton H2

Com-RuO2:

*Total Cost* = 252 + 1208.2 + 381.68 = 1841.88 $ per ton H2

Since Com-RuO2 did not pass our stability tests, the cost here is calculated based on activity and is therefore for reference only.


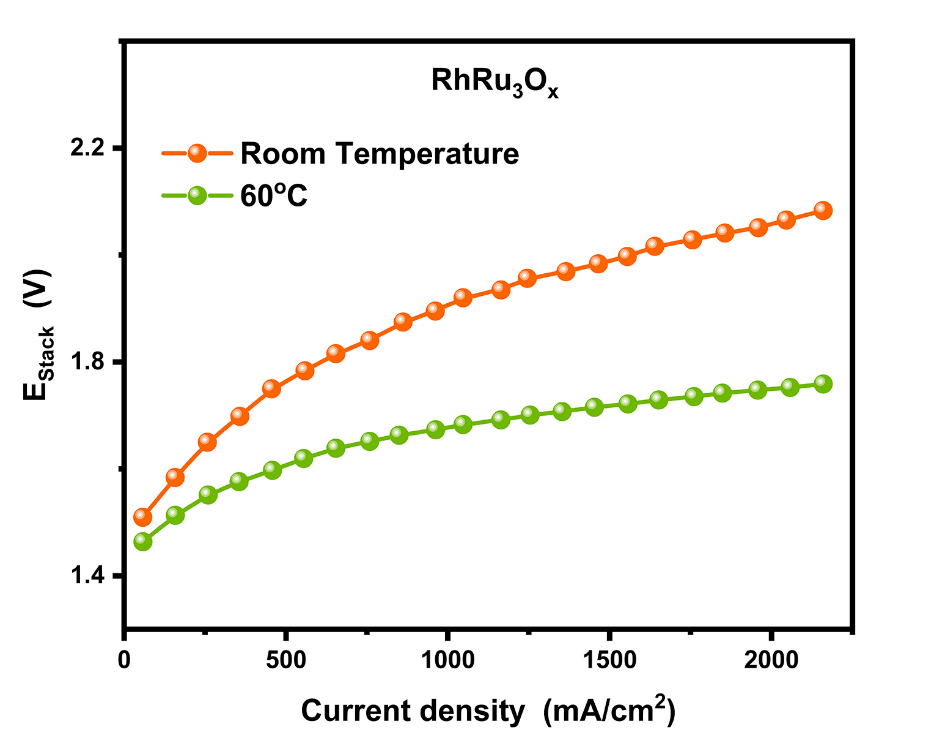


**Supplementary Figure 24. I–V curves at 60oC.** I–V curves of the PEM electrolyzer using RhRu3Ox as anodic catalyst and Pt/C as cathodic catalyst obtained at room temperature or 60oC with Nafion 115 membrane.


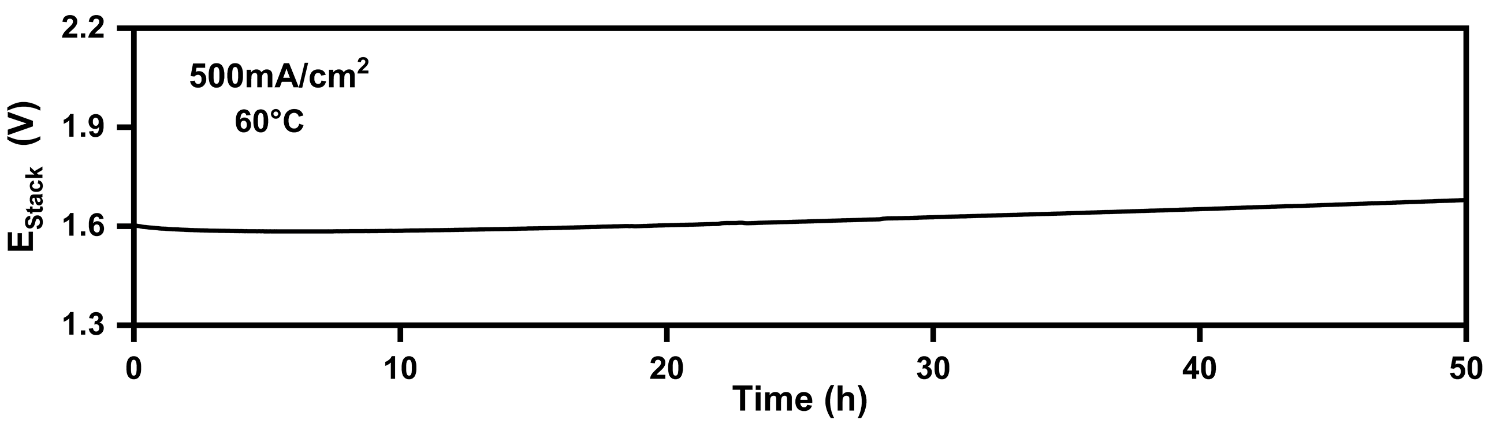


**Supplementary Figure 25. Stability test of RhRu3Ox at 60oC.** Chronopotentiometry curve of the PEM electrolyzer using RhRu3Ox as anodic catalyst and Pt/C as the cathode catalyst operated at 500 mA cm-2 at 60oC with Nafion 115 membrane. The stack voltage at the beginning (1.6V) to reach 500 mA cm−2 at 60 oC was even lower than the stack voltage required in room temperature (1.61V) to reach 200 mA cm−2.


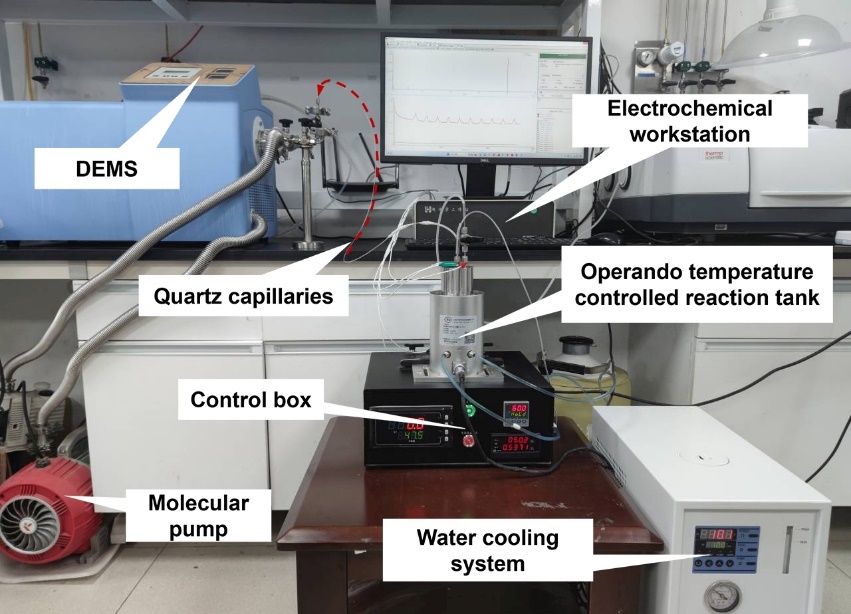


**Supplementary Figure 26. Photograph of operando TC-DEMS tandem experimental device.** The tandem experimental device consists of an electrochemical workstation, a differential electrochemical mass spectrometry, a homemade electrochemical reactor, and a water-cooling system. Some parameter information of our homemade electrochemical reactor. Pool volume: 20 mL; Variable temperature range: RT~200 ℃; Temperature control accuracy: ± 0.1 ℃; Magnetic stirring rate range 0-1,200 rpm. Maximum withstand pressure <=5MPa.


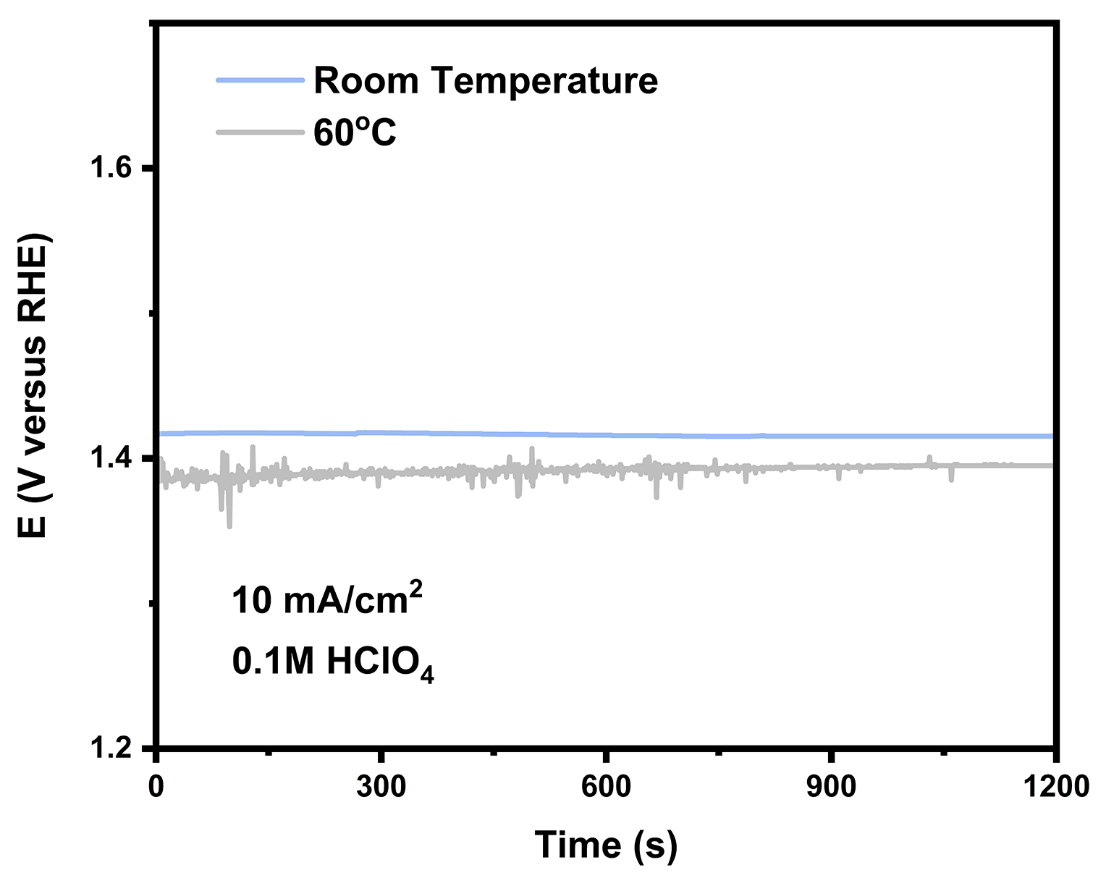


**Supplementary Figure 27. Labeling experiments in H218O/0.1M HClO4.** Chronopotentiometry curve at constant current density of 10 mA cm-2.


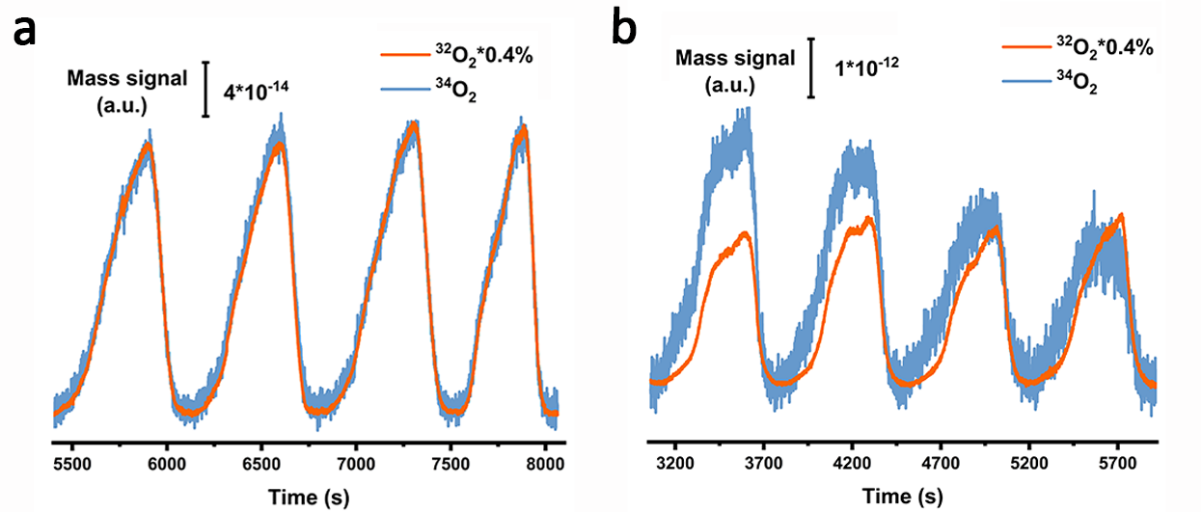


**Supplementary Figure 28. Mass spectrum signal comparison.** The signal base of 32O2 is flattened, then multiplied by the natural abundance of 18O by 0.2%, and compared with the signal of 34O2 after the baseline is flattened at room temperature (**a**) and 60oC (**b**).


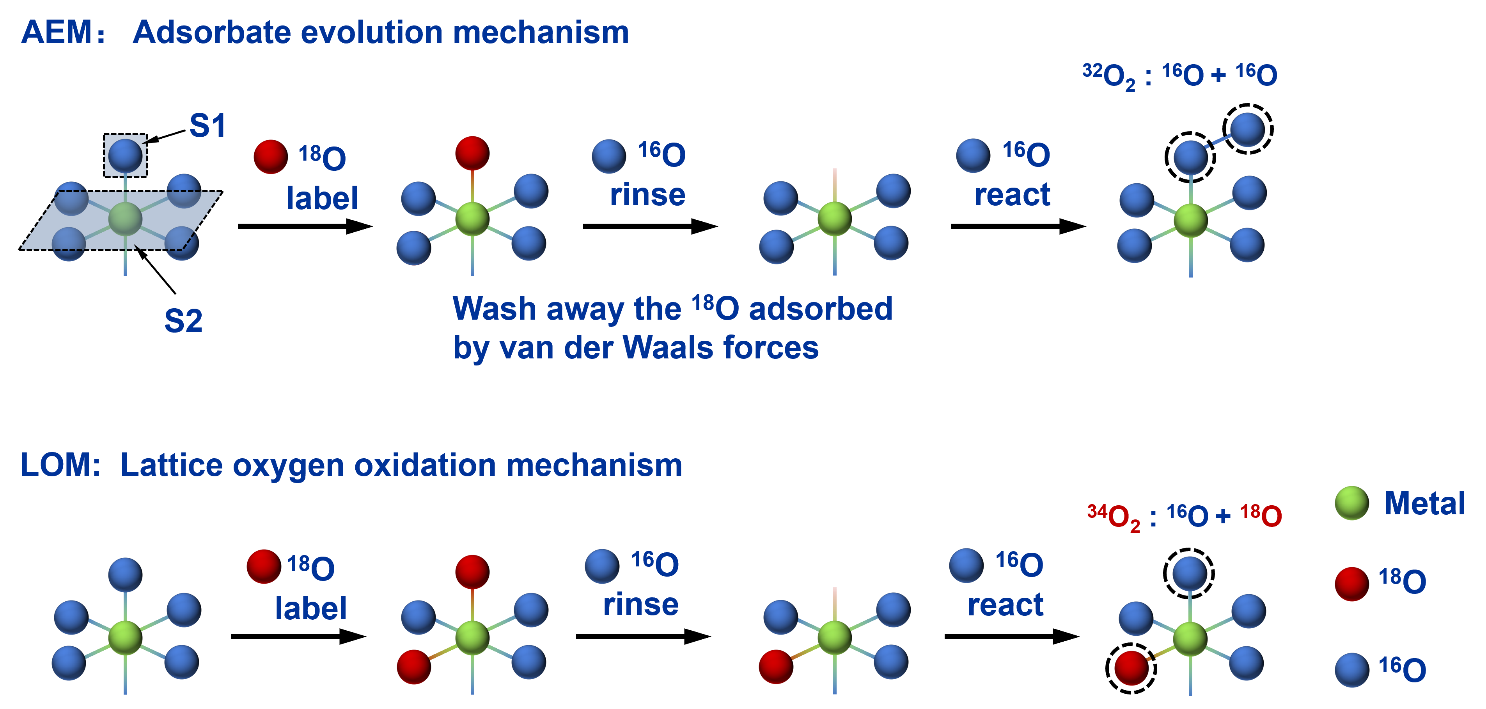


**Supplementary Figure 29. Simplified schematic diagram of isotopic labeling experiments following different OER mechanisms.** The upper part represents AEM and the bottom part represents LOM. The O atoms in the S1 plane represent adsorption by van der Waals forces, and the O atoms in the S2 plane represent adsorption by forming chemical bonds.

**Supplementary Note 9:**

**Inference of OER reaction mechanism**

If the reaction mechanism follows AEM, then after 18O labeling, 16O rinsing and finally reacting with 16O, the resulting 34O2:32O2 ratio should be maintained near 0.4%, which is derived from the natural abundance of 18O of 0.2% 15; The specific derivation process is as follows:

When the first and second oxygens of O2 are both 16O,

32O2 (16O-16O) = 99.8%*99.8% = 99.6004%

When the first oxygen of O2 is 16O and the second oxygen is 18O; Or when the first oxygen is 18O and the second oxygen is 16O,

34O2 (16O-18O, 18O-16O) = 99.8%*0.2%+99.8%*0.2% = 0.1996%+0.1996% = 0.3992%

When the first and second oxygens of O2 are both 18O,

36O2 (18O-18O) = 0.2%*0.2% = 0.0004%

The ratio of 34O2:32O2 is:

34O2:32O2 = 0.3992%÷99.6004% ≈ 0.4%

If the LOM is followed, the resulting 34O2:32O2 ratio should be higher than 0.4% after the same labeling process, and as the reaction progresses, the lattice oxygen labeled 18O is gradually consumed, so that the resulting 34O2:32O2 ratio gradually decreases and approaches 0.4% during this process.

**Supplementary Table 1.** ECSA parameters for different catalysts.

| **Catalysts** | **Cdl (F)** | **ECSA (cm2 ECSA)** |
| --- | --- | --- |
| RhRu3Ox  Hom-RuO2  Com-RuO2 | 0.01877 | 536 |
| 0.01203 | 344 |
| 0.00376 | 107 |

**Supplementary Table 2.** Operating conditions and corresponding performance of anode catalysts in PEM-WE device.

| **Catalysts** | **Stability (h)** | **Cell voltage (V)** | **Electrolyte** | **T (oC)** | | **j (mA cm-2)** | **ref** |
| --- | --- | --- | --- | --- | --- | --- | --- |
| RhRu3Ox  Ni-RuO2  SnRuOx  SS Pt-RuO2 HNSs  W0.2Er0.1Ru0.7  Nb0.1Ru0.9O2  RuO2/Ag nanowire  SrRuIr  (Mn0.94Ru0.06)O2  RuO2/D-TiO2  (Ru-W)Ox  (Ru-W)Ox | 1000 | 1.6 | DIW | RT | [200](mailto:5.7@100) | | This work |
| 1000  1300 | ~1.725  1.565 | 0.1M HClO4  DIW | RT  50 | [200](mailto:5.7@100)  [1000](mailto:5.7@100) | | *3*  *6* |
| 100 | 1.75 | DIW | RT | 100 | | *16* |
| 120 | 1.6 | 0.5M H2SO4 | RT | 100 | | *17* |
| 100 | 1.54 | DIW | 80 | 300 | | *18* |
| 120  150  200  100  50  500 | ~1.74  1.5  ~1.4  1.5  1.62  1.48 | DIW  DIW  DIW  0.5M H2SO4  DIW  DIW | 80  80  80  80  80  80 | 200  [100](mailto:37.97@100)0  [10](mailto:1.189@200)  200  1000  100 | | *19*  *20*  *1*  *21*  *22*  *22* |

T stands for Temperature, j stands for Current density.

**Supplementary Table 3.** Change in competitiveness of solar and wind by country based on global weighted average LCOE, 2010-2022. (Data comes from the International Renewable Energy Agency's "Renewable Energy Generation Costs in 2022")13

| **LCOE (US$ per kWh**) | **2010** | **2022** |
| --- | --- | --- |
| Solar photovoltaic  Offshore wind  Onshore wind | 0.445  0.197 | 0.049  0.081 |
| 0.107 | 0.033 |

Fossil fuel cost range from 0.244 to 0.069 US$ per kWh.

**Supplementary Table 4.** The probability of existence of 32O2, 34O2 and 36O2 (the natural abundance of 18O of 0.2%).

| **Types of isotopic oxygen** | **Probability of** **existence** | | **Probability of existence** | O2 (16O-16O, 18O-18O) |
| --- | --- | --- | --- | --- |
| 16O  18O | 99.8% | 99.8% | | 99.6004% |
| 0.2% | 0.2% | | 0.0004% |
| O2 (16O-18O, 18O-16O) | 0.1996% | 0.1996% | | 100% |

The ratio of 34O2:32O2 is:

34O2:32O2 = (0.1996%+0.1996%)÷99.6004% ≈ 0.4%

**References**

1 Kim, D. *et al.* Electronic structure modulation of MnO2 by Ru and F incorporation for efficient proton exchange membrane water electrolysis. *J. Mater. Chem. A* **10**, 21985-21994, (2022).

2 Wang, Y. *et al.* Unraveling oxygen vacancy site mechanism of Rh-doped RuO2 catalyst for long-lasting acidic water oxidation. *Nat. Commun.* **14**, 10, (2023).

3 Wu, Z. Y. *et al.* Non-iridium-based electrocatalyst for durable acidic oxygen evolution reaction in proton exchange membrane water electrolysis. *Nat. Mater.* **22**, 100-108, (2023).

4 Guo, Y. Y. *et al.* Noble metal alloy thin films by atomic layer deposition and rapid Joule heating. *Sci Rep* **12**, 9, (2022).

5 Zhu, J. Y. *et al.* In situ bubble template-assisted synthesis of phosphonate-functionalized Rh nanodendrites and their catalytic application. *Crystengcomm* **19**, 2946-2952, (2017).

6 Shi, Z. P. *et al.* Customized reaction route for ruthenium oxide towards stabilized water oxidation in high-performance PEM electrolyzers. *Nat. Commun.* **14**, 14, (2023).

7 Chen, F. Y. *et al.* Efficient conversion of low-concentration nitrate sources into ammonia on a Ru-dispersed Cu nanowire electrocatalyst. *Nat. Nanotechnol.* **17**, 759-767, (2022).

8 Lin, C. *et al.* In-situ reconstructed Ru atom array on α-MnO2 with enhanced performance for acidic water oxidation. *Nat. Catal.* **4**, 1012-1023, (2021).

9 Bernt, M., Siebel, A. & Gasteiger, H. A. Analysis of Voltage Losses in PEM Water Electrolyzers with Low Platinum Group Metal Loadings. *J. Electrochem. Soc.* **165**, F305-F314, (2018).

10 Suermann, M., Schmidt, T. J. & Buchi, F. N. Investigation of mass transport losses in polymer electrolyte electrolysis cells. *ECS Trans. (USA)* **69**, 1141-1148, (2015).

11 Ise, M., Kreuer, K. D. & Maier, J. Electroosmotic drag in polymer electrolyte membranes: an electrophoretic NMR study. *Solid State Ion.* **125**, 213-223, (1999).

12 King, L. A. *et al.* A non-precious metal hydrogen catalyst in a commercial polymer electrolyte membrane electrolyser. *Nat. Nanotechnol.* **14**, 1071-1074, (2019).

13 Renewable power generation costs in 2022. ( International Renewable Energy Agency, 2023).

14 Mayyas., A., Ruth., M., Pivovar., B., Bender., G. & Wipke., K. Manufacturing Cost Analysis for Proton Exchange Membrane Water Electrolyzers. (National Renewable Energy Laboratory, 2019).

15 Grimaud, A. *et al.* Activating lattice oxygen redox reactions in metal oxides to catalyse oxygen evolution (vol 9, pg 457, 2017). *Nat. Chem.* **9**, 1, (2017).

16 Wang, J. *et al.* Single-site Pt-doped RuO2 hollow nanospheres with interstitial C for high-performance acidic overall water splitting. *Sci. Adv.* **8**, 11, (2022).

17 Hao, S. Y. *et al.* Dopants fixation of Ruthenium for boosting acidic oxygen evolution stability and activity. *Nat. Commun.* **11**, 11, (2020).

18 Liu, H. *et al.* Eliminating over-oxidation of ruthenium oxides by niobium for highly stable electrocatalytic oxygen evolution in acidic media. *Joule* **7**, 558-573, (2023).

19 Tang, J. Y., Zhong, Y. J., Su, C. & Shao, Z. P. Silver Compositing Boosts Water Electrolysis Activity and Durability of RuO2 in a Proton-Exchange-Membrane Water Electrolyzer. *Small Sci.* **3**, 9, (2023).

20 Wen, Y. Z. *et al.* Stabilizing Highly Active Ru Sites by Suppressing Lattice Oxygen Participation in Acidic Water Oxidation. *J. Am. Chem. Soc.* **143**, 6482-6490, (2021).

21 Wang, X. J. *et al.* Electronic Structure Modulation of RuO2 by TiO2 Enriched with Oxygen Vacancies to Boost Acidic O2 Evolution. *ACS Catal.* **12**, 9437-9445, (2022).

22 Deng, L. *et al.* Valence Oscillation of Ru Active Sites for Efficient and Robust Acidic Water Oxidation.*Advanced Materials 35.48 (2023): 2305939.*
